# Supplementary material for: Genetics, Molecular Control and Clinical Relevance of Habituation Learning
Source: Preprints.org preprint supplement (doi:10.20944/preprints202201.0186.v1), 2022-01-13
Supplement: Supplementary file 1 [file supplementary]

## Sheet: Table S1_genes
Human ortholog via DIOPT	Original gene name (in species)	Species	Effect on function	Mutation (or manipulation)	Habituation paradigm	Habituation paradigm details	Reference	Included in analysis
AP2S1	aps-2	Caenorhabiditis elegans	Predicted LoF	tm2752 deletion mutant; 319 bp deletion + 8 bp insertion	Mechanosensory habituation	Habituation deficit defined as reduced habituation of response probability. Additionally an increased initial response distance was observed. 30 mechanosensory stimuli at a 10 second interstimulus interval (ISI) after measuring baseline locomotion for 5 min	PMID:31754030_2020_McDiarmid_Rankin	Yes
APP; APLP1/2	apl-1	Caenorhabiditis elegans	GoF	apl-1 overexpression (transgenic animals with APL-1 expression driven by the pan-neuronal rab-3 promoter (ynIs91, ynIs104, ynIs112) or ectopic (including pan-neuronal) expression driven by the snb-1 promoter (ynIs12, ynIs13, ynIs109))	Mechanosensory habituation	Habituation to repeated head–tail touch cycles. Transgenic animals carrying an apl-1 genomic fragment or a mutated apl-1 fragment showed wild-type habituation; only ectopic expression (panneuronal) caused habituation defect	PMID:22836251_2012_Ewald_Li	Yes
ARID1A/B	let-526	Caenorhabiditis elegans	Unknown	gk110913 mutant, C/T (wild type/variant) substitution, predicted deleterious	Mechanosensory habituation	Habituation deficit defined as reduced habituation of response duration. Additionally a reduced initial response duration was observed. 30 mechanosensory stimuli at a 10 second interstimulus interval (ISI) after measuring baseline locomotion for 5 min	PMID:31754030_2020_McDiarmid_Rankin	Yes
CACNA1A/B/E	unc-2	Caenorhabiditis elegans	Predicted LoF	e55 premature stop mutant; AA: Q to STOP	Mechanosensory habituation	Habituation deficit defined as reduced habituation of response probability, reduced habituation of reponse duration, and reduced habituation of response distance. Additionally a reduced initial response probability, reduced initial response duration, and reduced initial response distance were observed. 30 mechanosensory stimuli at a 10 second interstimulus interval (ISI) after measuring baseline …	PMID:31754030_2020_McDiarmid_Rankin	Yes
CACNA1A/B/E	unc-2	Caenorhabiditis elegans	Predicted LoF	k366 mutant; 694 bp deletion	Mechanosensory habituation	Habituation deficit defined as reduced habituation of response probability, reduced habituation of reponse duration, and reduced habituation of response distance. Additionally a reduced initial response probability, reduced initial response duration, and reduced initial response distance were observed. 30 mechanosensory stimuli at a 10 second interstimulus interval (ISI) after measuring baseline …	PMID:31754030_2020_McDiarmid_Rankin	Yes
CACNA2D1/2/3/4	unc-36	Caenorhabiditis elegans	Unknown	ad698 mutant; effect unknown	Mechanosensory habituation	Habituation deficit defined as reduced habituation of response probability, reduced habituation of reponse duration, and reduced habituation of response distance. Additionally a reduced initial response probability, reduced initial response duration, and reduced initial response distance, and reduced initial response speed were observed. 30 mechanosensory stimuli at a 10 second interstimulus inte…	PMID:31754030_2020_McDiarmid_Rankin	Yes
CACNA2D1/2/3/4	unc-36	Caenorhabiditis elegans	Predicted LoF	e251 premature stop mutant; AA: W to STOP	Mechanosensory habituation	Habituation deficit defined as reduced habituation of response probability, reduced habituation of reponse duration, and reduced habituation of response distance. Additionally a reduced initial response probability, reduced initial response duration, and reduced initial response distance, and reduced initial response speed were observed. 30 mechanosensory stimuli at a 10 second interstimulus inte…	PMID:31754030_2020_McDiarmid_Rankin	Yes
CAMK1D/G; CAMK1; PNCK	cmk-1	Caenorhabiditis elegans	LoF	cmk-1(oy21) putative null mutant	Mechanosensory habituation	Tap habituation. Reversal distance in 60s inter-stimulus-interval. Habituation premature when using ISI of 10s. Also experiments with cmk-1 presumed gain-of-function allele pg58; but not defined to have habituation deficit, rather increased initial startle response.	PMID:30429311_2018_Ardiel_Rankin	Yes
CDKL3/5	cdkl-1	Caenorhabiditis elegans	Predicted LoF	ok2694 deletion mutant; 647 bp deletion	Mechanosensory habituation	Habituation deficit defined as reduced habituation of response probability, reduced habituation of reponse duration, and reduced habituation of response distance. Additionally a reduced initial response probability, reduced initial response duration, and reduced initial response distance were observed. 30 mechanosensory stimuli at a 10 second interstimulus interval (ISI) after measuring baseline …	PMID:31754030_2020_McDiarmid_Rankin	Yes
CELF3/4/5/6	unc-75	Caenorhabiditis elegans	Unknown	e950 mutant, predicted deleterious	Mechanosensory habituation	Habituation deficit defined as reduced habituation of response probability, reduced habituation of reponse duration, and reduced habituation of response distance. Additionally a reduced initial response probability (1/2 strains), reduced initial response duration, and reduced initial response distance were observed. 30 mechanosensory stimuli at a 10 second interstimulus interval (ISI) after measu…	PMID:31754030_2020_McDiarmid_Rankin	Yes
CELF3/4/5/6	unc-75	Caenorhabiditis elegans	Unknown	tm9711 mutant, predicted deleterious	Mechanosensory habituation	Habituation deficit defined as reduced habituation of response probability, reduced habituation of reponse duration, and reduced habituation of response distance. Additionally a reduced initial response probability (1/2 strains), reduced initial response duration, and reduced initial response distance were observed. 30 mechanosensory stimuli at a 10 second interstimulus interval (ISI) after measu…	PMID:31754030_2020_McDiarmid_Rankin	Yes
CREB1; CREM	crh-1	Caenorhabiditis elegans	LoF	Loss-of-function mutation in crh-l	Mechanosensory habituation	Tap withdrawl long term habituation; Mean reversal length ( ± SEM) to five test taps presented 24 hr after spaced training.	PMID:21688885_2011_Timbers_Rankin	Yes
CTNNB1	bar-1	Caenorhabiditis elegans	Predicted LoF	ga80 premature stop mutant; AA: Q to STOP	Mechanosensory habituation	Habituation deficit defined as reduced habituation of response distance. 30 mechanosensory stimuli at a 10 second interstimulus interval (ISI) after measuring baseline locomotion for 5 min.	PMID:31754030_2020_McDiarmid_Rankin	Yes
DPYS/2/3/4/5; CRMP1	dhp-1	Caenorhabiditis elegans	Predicted LoF	tm1072 deletion mutant; 1439 bp deletion	Mechanosensory habituation	Habituation deficit defined as reduced habituation of response probability. Additionally a reduced initial response speed was observed. 30 mechanosensory stimuli at a 10 second interstimulus interval (ISI) after measuring baseline locomotion for 5 min	PMID:31754030_2020_McDiarmid_Rankin	Yes
ELAVL1/2/3/4	exc-7	Caenorhabiditis elegans	Predicted LoF	rh252 deletion mutant; 252 bp deletion	Mechanosensory habituation	Habituation deficit defined as reduced habituation of reponse duration, and reduced habituation of response distance. Additionally an increased habituation of response probability, a reduced initial response duration, and reduced initial response distance were observed. 30 mechanosensory stimuli at a 10 second interstimulus interval (ISI) after measuring baseline locomotion for 5 min.	PMID:31754030_2020_McDiarmid_Rankin	Yes
FAT1/2/3	cdh-4	Caenorhabiditis elegans	Predicted LoF	ok1323 mutant, estimated deletion size: about 1400 bp, predicted deleterious	Mechanosensory habituation	Habituation deficit defined as reduced habituation of response distance. 30 mechanosensory stimuli at a 10 second interstimulus interval (ISI) after measuring baseline locomotion for 5 min.	PMID:31754030_2020_McDiarmid_Rankin	Yes
GIGYF1/2	C18H9.3	Caenorhabiditis elegans	Predicted LoF	tm4671 deletion mutant; 476 bp deletion	Mechanosensory habituation	Habituation deficit defined as reduced habituation of response distance. 30 mechanosensory stimuli at a 10 second interstimulus interval (ISI) after measuring baseline locomotion for 5 min	PMID:31754030_2020_McDiarmid_Rankin	Yes
GRIA1/2/3/4	glr-1	Caenorhabiditis elegans	LoF	glr-1 (n2461) mutant nul allele. In C.Elegans database mutation is annotated as stop codon introduction. p.W807X	Olfactory habituation	Habituation deficit defined as maintained diacetyl tracking after 15 min exposure to stimulus (which is not tracked by the control). Nonassociative learning is impaired in glr-l(n2461) mutants. glr-1 nematodes do not habituate to diacetyl (DA). After a 15-min exposure to DA, tracking in N2 nematodes decreased significantly from naive levels. After washing and spinning (dishabituation), tracking i…	PMID:11439453_2001_Morrison_Kooy	Yes
GRIA1/2/3/4	glr-1	Caenorhabiditis elegans	LoF	glr-1(ky176) The original glr-1(ky176) strain contains an out-of-frame deletion that removes most of the protein, including the C-terminal tail, all three transmembrane domains, the pore-lining domain, and the ligand binding domain.	Mechanosensory habituation	Mechanical shock stimulation habituation; difference in reversal magnitude comparing stimulated (7x 15 mechanical shocks) and unstimulated worms. Deficit showing no difference between the two.	PMID:19242552_2009_Emtage_Rongo	Yes
GRIA1/2/3/4	glr-1	Caenorhabiditis elegans	LoF	glr-1[ky176]; competitive non-NMDA glutamate receptor antagonist DNQX	Mechanosensory habituation	_	PMID:14573539_2003_Rose_Rankin	Yes
GRIA1/2/3/4	glr-1	Caenorhabiditis elegans	LoF	glr-1[n2461]; competitive non-NMDA glutamate receptor antagonist DNQX	Mechanosensory habituation	Long-term memory for habituation, tap assay. Short-term habituation not affected; long-term habituation affected in both alleles	PMID:14573539_2003_Rose_Rankin	Yes
GRIA1/2/3/4	glr-2	Caenorhabiditis elegans	LoF	glr-2(ak10) null allele	Mechanosensory habituation	Mechanical shock stimulation habituation; difference in reversal magnitude comparing stimulated (7x 15 mechanical shocks) and unstimulated worms. Deficit showing no difference between the two.	PMID:19242552_2009_Emtage_Rongo	Yes
IRX1/2/3/4/5/6	irx-1	Caenorhabiditis elegans	Predicted LoF	tm238 deletion mutant; 349 bp deletion	Mechanosensory habituation	Habituation deficit defined as reduced habituation of response probability. Additionally a reduced initial response speed was observed. 30 mechanosensory stimuli at a 10 second interstimulus interval (ISI) after measuring baseline locomotion for 5 min	PMID:31754030_2020_McDiarmid_Rankin	Yes
KCNQ1/2/3/4/5	kqt-1	Caenorhabiditis elegans	Predicted LoF	tm8384 deletion mutant; 100 bp deletion	Mechanosensory habituation	Habituation deficit defined as reduced habituation of reponse probability. Additionally an increased habituation of response duration (1/2 strains), increased habituation of response distance (1/2 strains), increased initial response duration (1/2 strains), and increased initial response distance were observed. 30 mechanosensory stimuli at a 10 second interstimulus interval (ISI) after measuring …	PMID:31754030_2020_McDiarmid_Rankin	Yes
KCNQ1/2/3/4/5	kqt-1	Caenorhabiditis elegans	Predicted LoF	tm846 deletion mutant; 326 bp deletion	Mechanosensory habituation	Habituation deficit defined as reduced habituation of reponse probability. Additionally an increased habituation of response duration (1/2 strains), increased habituation of response distance (1/2 strains), increased initial response duration (1/2 strains), and increased initial response distance were observed. 30 mechanosensory stimuli at a 10 second interstimulus interval (ISI) after measuring …	PMID:31754030_2020_McDiarmid_Rankin	Yes
KDM6A/B	jmjd-3.3	Caenorhabiditis elegans	Predicted LoF	tm3104 deletion mutant; 204 bp deletion	Mechanosensory habituation	Habituation deficit defined as reduced habituation of response probability. Additionally an increased habituation of response duration (1/2 strains), a increased habituation of response distance (1/2 strains), an increased initial response distance (1/2 strains), and a reduced intial response speed (1/2 strains) were observed. 30 mechanosensory stimuli at a 10 second interstimulus interval (ISI) …	PMID:31754030_2020_McDiarmid_Rankin	Yes
KDM6A/B	jmjd-3.3	Caenorhabiditis elegans	Predicted LoF	tm3197 deletion mutation; 252 bp deletion	Mechanosensory habituation	Habituation deficit defined as reduced habituation of response probability. Additionally an increased habituation of response duration (1/2 strains), a increased habituation of response distance (1/2 strains), an increased initial response distance (1/2 strains), and a reduced intial response speed (1/2 strains) were observed. 30 mechanosensory stimuli at a 10 second interstimulus interval (ISI) …	PMID:31754030_2020_McDiarmid_Rankin	Yes
KMT2C/D	set-16	Caenorhabiditis elegans	Unknown	gk190875 mutant, C/T (wild type/variant) substitution, predicted deleterious	Mechanosensory habituation	Habituation deficit defined as reduced habituation of response duration and reduced habituation of response distance. Additionally an reduced initial response duration and reduced initial response distance were observed. 30 mechanosensory stimuli at a 10 second interstimulus interval (ISI) after measuring baseline locomotion for 5 min	PMID:31754030_2020_McDiarmid_Rankin	Yes
LAMA3/4/5	epi-1	Caenorhabiditis elegans	Unknown	gm57 mutant; effect unknown	Mechanosensory habituation	Habituation deficit defined as reduced habituation of response distance. Additionally a reduced initial response probability, a reduced initial response duration, and a reduced initial response distance were observed. 30 mechanosensory stimuli at a 10 second interstimulus interval (ISI) after measuring baseline locomotion for 5 min	PMID:31754030_2020_McDiarmid_Rankin	Yes
LEF1; TCF7L1/2; TCF7	pop-1	Caenorhabiditis elegans	Predicted LoF	tm6676 deletion mutant; 392 bp deletion	Mechanosensory habituation	Habituation deficit defined as reduced habituation of response probability. Additionally an increased habituation of response duration, an increased habituation of response distance, an increased initial response duration, and an increased initial response distance were observed. 30 mechanosensory stimuli at a 10 second interstimulus interval (ISI) after measuring baseline locomotion for 5 min, i…	PMID:31754030_2020_McDiarmid_Rankin	Yes
MAGI1/2/3	magi-1	Caenorhabiditis elegans	LoF	magi-1(tm446)	Mechanosensory habituation	Mechanical shock stimulation habituation; difference in reversal magnitude comparing stimulated (7x 15 mechanical shocks) and unstimulated worms. Deficit showing no difference between the two.	PMID:19242552_2009_Emtage_Rongo	Yes
OGT	ogt-1	Caenorhabiditis elegans	LoF	ogt-1(ok430) null mutant; complete loss of transferase activity	Mechanosensory habituation	Tap habituation. Reversal distance in 60s inter-stimulus-interval. Habituation not defined to be defective when using 10s ISI. Also described to have done experiments with ogt-1(ok1474) = less severe deletion allele, and ogt-1(tm1046) = habituation phenotype similar to ogt-1(ok430) null mutants. But no spefication on deficits. Same gene + effect so doesnt have to be included.	PMID:30429311_2018_Ardiel_Rankin	Yes
PAX2/5/8	pax-2	Caenorhabiditis elegans	Predicted LoF	ok3078 insertion/deletion mutant; 21pb insertion/527 bp deletion	Mechanosensory habituation	30 mechanosensory stimuli at a 10 second interstimulus interval (ISI) after measuring baseline locomotion for 5 min. Habituation defined as reduced response probability (2/3 strains) and reduced habituation of response duration (1/3 strains). Additionally a reduced initial response probability (1/3 strains), and a reduced initial response duration (1/3 strains) were observed.	PMID:31754030_2020_McDiarmid_Rankin	yes
PAX2/5/8	pax-2	Caenorhabiditis elegans	Predicted LoF	ok935 deletion mutation; 1620 bp deletion	Mechanosensory habituation	30 mechanosensory stimuli at a 10 second interstimulus interval (ISI) after measuring baseline locomotion for 5 min. Habituation defined as reduced response probability (2/3 strains) and reduced habituation of response duration (1/3 strains). Additionally a reduced initial response probability (1/3 strains), and a reduced initial response duration (1/3 strains) were observed.	PMID:31754030_2020_McDiarmid_Rankin	yes
PAX2/5/8	pax-2	Caenorhabiditis elegans	Unknown	ok946 mutant; effect unknown	Mechanosensory habituation	30 mechanosensory stimuli at a 10 second interstimulus interval (ISI) after measuring baseline locomotion for 5 min. Habituation defined as reduced response probability (2/3 strains) and reduced habituation of response duration (1/3 strains). Additionally a reduced initial response probability (1/3 strains), and a reduced initial response duration (1/3 strains) were observed.	PMID:31754030_2020_McDiarmid_Rankin	yes
POGZ	row-1	Caenorhabiditis elegans	Predicted LoF	tm556 deletion mutant; 493 bp deletion	Mechanosensory habituation	Habituation deficit defined as reduced habituation of response probability. 30 mechanosensory stimuli at a 10 second interstimulus interval (ISI) after measuring baseline locomotion for 5 min	PMID:31754030_2020_McDiarmid_Rankin	Yes
PPP1R9A/B	nab-1	Caenorhabiditis elegans	Predicted LoF	ok943 deletion mutant; 1032 bp deletion	Mechanosensory habituation	Habituation deficit defined as reduced habituation of response probability. 30 mechanosensory stimuli at a 10 second interstimulus interval (ISI) after measuring baseline locomotion for 5 min.	PMID:31754030_2020_McDiarmid_Rankin	Yes
PRKD1/2/3	dkf-1	Caenorhabiditis elegans	Predicted LoF	ok2695 deletion mutant; 876 bp deletion	Mechanosensory habituation	Habituation deficit defined as reduced habituation of response duration and reduced habituation of response distance. Additionally a reduced initial response duration, and a reduced initial response distance were observed. 30 mechanosensory stimuli at a 10 second interstimulus interval (ISI) after measuring baseline locomotion for 5 min	PMID:31754030_2020_McDiarmid_Rankin	Yes
RALGAPA1/2	hgap-1	Caenorhabiditis elegans	Predicted LoF	gk101481 premature stop mutant; AA: W to STOP	Mechanosensory habituation	Habituation deficit defined as reduced habituation of response distance. Additionally a reduced initial response distance was observed. 30 mechanosensory stimuli at a 10 second interstimulus interval (ISI) after measuring baseline locomotion for 5 min	PMID:31754030_2020_McDiarmid_Rankin	Yes
SETD2	met-1	Caenorhabiditis elegans	Predicted LoF	gk510 deletion mutant; 1147 bp deletion	Mechanosensory habituation	Habituation deficit defined as reduced habituation of response probability (1/2 strains) and reduced habituation of response distance (1/2 strains). Additionally a reduced initial response probability (1/2 strains), a reduced initial response duration (1/2 strains), and a reduced initial response distance (1/2 strains) were observed. 30 mechanosensory stimuli at a 10 second interstimulus interval…	PMID:31754030_2020_McDiarmid_Rankin	Yes
SETD2	met-1	Caenorhabiditis elegans	Predicted LoF	ok2172 deletion mutant; 1271 bp deletion	Mechanosensory habituation	Habituation deficit defined as reduced habituation of response probability (1/2 strains) and reduced habituation of response distance (1/2 strains). Additionally a reduced initial response probability (1/2 strains), a reduced initial response duration (1/2 strains), and a reduced initial response distance (1/2 strains) were observed. 30 mechanosensory stimuli at a 10 second interstimulus interval…	PMID:31754030_2020_McDiarmid_Rankin	Yes
SLC17A6/7/8	eat-4	Caenorhabiditis elegans	LoF	eat-4(ky5); loss-of-function, putative null	Mechanosensory habituation	Long-term tap habituation	PMID:12075001_2002_Rose_Rankin	Yes
SPAG9; MAPK8IP3	unc-16	Caenorhabiditis elegans	Predicted LoF	e109 deletion mutant; 448 bp deletion	Mechanosensory habituation	Habituation deficit defined as reduced habituation of response probability (1/2 strains) and reduced habituation of response distance. Additionally a reduced initial response probability (1/2 strains), and a reduced initial response distance were observed. 30 mechanosensory stimuli at a 10 second interstimulus interval (ISI) after measuring baseline locomotion for 5 min	PMID:31754030_2020_McDiarmid_Rankin	Yes
SPAG9; MAPK8IP3	unc-16	Caenorhabiditis elegans	Predicted LoF	n730 premature stop mutant; AA: W to STOP	Mechanosensory habituation	Habituation deficit defined as reduced habituation of response probability (1/2 strains) and reduced habituation of response distance. Additionally a reduced initial response probability (1/2 strains), and a reduced initial response distance were observed. 30 mechanosensory stimuli at a 10 second interstimulus interval (ISI) after measuring baseline locomotion for 5 min	PMID:31754030_2020_McDiarmid_Rankin	Yes
STXBP1/2/3	unc-18	Caenorhabiditis elegans	Predicted LoF	e234 premature stop mutant; AA:Q to STOP	Mechanosensory habituation	Habituation deficit defined as reduced habituation of response proability, reduced habituation of response duration, and reduced habituation of response distance. Additionally a reduced initial response probability, a reduced initial response duration, a reduced initial response distance, and a reduced initial response speed (1/3 strains) were observed. 30 mechanosensory stimuli at a 10 second in…	PMID:31754030_2020_McDiarmid_Rankin	Yes
STXBP1/2/3	unc-18	Caenorhabiditis elegans	Predicted LoF	e81 premature stop mutant; AA: Q to STOP	Mechanosensory habituation	Habituation deficit defined as reduced habituation of response proability, reduced habituation of response duration, and reduced habituation of response distance. Additionally a reduced initial response probability, a reduced initial response duration, a reduced initial response distance, and a reduced initial response speed (1/3 strains) were observed. 30 mechanosensory stimuli at a 10 second in…	PMID:31754030_2020_McDiarmid_Rankin	Yes
STXBP1/2/3	unc-18	Caenorhabiditis elegans	Unknown	md299 mutant; unknown effect	Mechanosensory habituation	Habituation deficit defined as reduced habituation of response proability, reduced habituation of response duration, and reduced habituation of response distance. Additionally a reduced initial response probability, a reduced initial response duration, a reduced initial response distance, and a reduced initial response speed (1/3 strains) were observed. 30 mechanosensory stimuli at a 10 second in…	PMID:31754030_2020_McDiarmid_Rankin	Yes
SYNE1/2	anc-1	Caenorhabiditis elegans	Unknown	e1753 mutant; effect unknown	Mechanosensory habituation	Habituation deficit defined as reduced habituation of response distance. Additionally a reduced initial response duration, and a reduced initial response distance were observed. 30 mechanosensory stimuli at a 10 second interstimulus interval (ISI) after measuring baseline locomotion for 5 min.	PMID:31754030_2020_McDiarmid_Rankin	Yes
UNCX	unc-4	Caenorhabiditis elegans	Predicted LoF	e120 substitution mutant; c/t (WT/variant) substitution	Mechanosensory habituation	Habituation deficit defined as reduced habituation of response probability, reduced habituation of reponse duration (1/2 strains), and reduced habituation of response distance. Additionally a reduced initial response probability, reduced initial response duration, and reduced initial response distance were observed. 30 mechanosensory stimuli at a 10 second interstimulus interval (ISI) after measu…	PMID:31754030_2020_McDiarmid_Rankin	Yes
UNCX	unc-4	Caenorhabiditis elegans	Predicted LoF	gk705 deletion mutant; 307 bp deletion	Mechanosensory habituation	Habituation deficit defined as reduced habituation of response probability, reduced habituation of reponse duration (1/2 strains), and reduced habituation of response distance. Additionally a reduced initial response probability, reduced initial response duration, and reduced initial response distance were observed. 30 mechanosensory stimuli at a 10 second interstimulus interval (ISI) after measu…	PMID:31754030_2020_McDiarmid_Rankin	Yes
UPF3A/B	smg-4	Caenorhabiditis elegans	Predicted LoF	32bp insertion/ 338 bp deletion	Mechanosensory habituation	Habituation deficit defined as reduced habituation of response probability. Additionally a reduced initial response distance was observed. 30 mechanosensory stimuli at a 10 second interstimulus interval (ISI) after measuring baseline locomotion for 5 min.	PMID:31754030_2020_McDiarmid_Rankin	Yes
UPF3A/B	smg-4	Caenorhabiditis elegans	Predicted LoF	tm5409 insertion/deletion mutant	Mechanosensory habituation	Habituation deficit defined as reduced habituation of response probability. Additionally a reduced initial response distance was observed. 30 mechanosensory stimuli at a 10 second interstimulus interval (ISI) after measuring baseline locomotion for 5 min.	PMID:31754030_2020_McDiarmid_Rankin	Yes
ZMYND8/11	bra-1	Caenorhabiditis elegans	Predicted LoF	nk1 deletion mutant; 816 bp deletion	Mechanosensory habituation	Habituation deficit defined as reduced habituation of response distance. Additionally a reducedinitial response distance was observed. 30 mechanosensory stimuli at a 10 second interstimulus interval (ISI) after measuring baseline locomotion for 5 min; Cite PMID:31754030 for inclusion of zmynd8	PMID:31754030_2020_McDiarmid_Rankin	Yes
AKT3	akt3b	Danio rerio	Predicted LoF	CRISPR induced truncating mutation: a230	Mechanosensory habituation	Tap Habituation	PMID:30929901_2019_Thyme_Schier	Yes
AP2S1	ap2s1	Danio rerio	Unknown	mutant p172 loss of Exon 3	Acoustic startle habituation	Gene locus not yet identified at time of publication. Short-term habituation to repetitive acoustic stimuli	PMID:25754827_2015_Wolman_Granato	Yes
CACNA1C	cacna1c	Danio rerio	Predicted LoF	CRISPR induced truncating mutation: a366	Mechanosensory habituation	Tap Habituation	PMID:30929901_2019_Thyme_Schier	Yes
CACNB2	cacnb2a	Danio rerio	Predicted LoF	CRISPR induced truncating mutation: a246	Mechanosensory habituation	Tap Habituation	PMID:30929901_2019_Thyme_Schier	Yes
CACNB2	cacnb2b	Danio rerio	Predicted LoF	CRISPR induced truncating mutation: a247	Mechanosensory habituation	Tap Habituation	PMID:30929901_2019_Thyme_Schier	Yes
CHRM4	chrm4a	Danio rerio	Predicted LoF	CRISPR induced truncating mutation: a248	Mechanosensory habituation	Tap Habituation	PMID:30929901_2019_Thyme_Schier	Yes
CLCN3	clcn3	Danio rerio	Predicted LoF	CRISPR induced truncating mutation: a251	Mechanosensory habituation	Tap Habituation	PMID:30929901_2019_Thyme_Schier	Yes
ELFN1	elfn1a	Danio rerio	Predicted LoF	CRISPR induced truncating mutation: a216	Mechanosensory habituation	Tap Habituation	PMID:30929901_2019_Thyme_Schier	Yes
ELFN1	elfn1b	Danio rerio	Predicted LoF	CRISPR induced truncating mutation: a217	Mechanosensory habituation	Tap Habituation	PMID:30929901_2019_Thyme_Schier	Yes
FMR1	fmr1	Danio rerio	LoF	The fmr1[hu2787] mutants have a change (C to T) in the fmr1 coding region leading to a nonsense-mediated-decay and the loss of the protein	Visual startle habituation	Habituation to a looming stumulus. The stimulus train consisted of three blocks of 10 looms with 5min of rest (with a white screen) between each block. https://doi.org/10.1101/722074	bioRxiv_X_Marquez-Legorreta_Scott	Yes
GIGYF2	gigyf2	Danio rerio	Predicted LoF	CRISPR induced truncating mutation: a273	Mechanosensory habituation	Tap Habituation	PMID:30929901_2019_Thyme_Schier	Yes
GPM6A	gpm6aa	Danio rerio	Predicted LoF	CRISPR induced truncating mutation: a275	Mechanosensory habituation	Tap Habituation	PMID:30929901_2019_Thyme_Schier	Yes
GPM6A	gpm6ab	Danio rerio	Predicted LoF	CRISPR induced truncating mutation: a276	Mechanosensory habituation	Tap Habituation	PMID:30929901_2019_Thyme_Schier	Yes
GRIN2A	grin2ab	Danio rerio	Predicted LoF	CRISPR induced truncating mutation: a279	Mechanosensory habituation	Tap Habituation	PMID:30929901_2019_Thyme_Schier	Yes
GRIN2A	grin2aa	Danio rerio	Predicted LoF	CRISPR induced truncating mutation: a280	Mechanosensory habituation	Tap Habituation	PMID:30929901_2019_Thyme_Schier	Yes
IREB2	ireb2	Danio rerio	Predicted LoF	CRISPR induced truncating mutation: a287	Mechanosensory habituation	Tap Habituation	PMID:30929901_2019_Thyme_Schier	Yes
KCNA1	kcna1a	Danio rerio	Unknown	mutant p181 missense mutation	Acoustic startle habituation	Gene locus not yet identified at time of publication. Short-term habituation to repetitive acoustic stimuli	PMID:25754827_2015_Wolman_Granato	Yes
MAD1L1	mad1l1	Danio rerio	Predicted LoF	CRISPR induced truncating mutation: a296	Mechanosensory habituation	Tap Habituation	PMID:30929901_2019_Thyme_Schier	Yes
MMP16	mmp16a	Danio rerio	Predicted LoF	CRISPR induced truncating mutation: a301	Mechanosensory habituation	Tap Habituation	PMID:30929901_2019_Thyme_Schier	Yes
MMP16	mmp16b	Danio rerio	Predicted LoF	CRISPR induced truncating mutation: a302	Mechanosensory habituation	Tap Habituation	PMID:30929901_2019_Thyme_Schier	Yes
NF1	nf1a-nf1b	Danio rerio	LoF	Nf1a-nf1b double-homozygous mutants	Visual startle habituation	Dark-flash habituation	PMID:30955936_2019_Randlett_Granato	Yes
NF1	nf1a	Danio rerio	LoF	The zebrafish (Danio rerio) larvae used in this study were generated from crosses of adults carrying the nf1aΔ5 and nf1b+10 mutant alleles	Visual startle habituation	Dark-flash habituation; To measure visual short-term habituation, a series of 40 1 s dark flashes were delivered. Stimuli 1–10 were delivered with 30 s ISIs and stimuli 11–40 were delivered with 3 s ISIs. The percentage of habituation was calculated by dividing the mean O-bend responsiveness to stimuli 31–40 by the mean O-bend responsiveness to stimuli 1–10, subtracting this value from 1, and mul…	PMID:25176649_2014_Wolman_Epstein	Yes
NF1	nf1b	Danio rerio	LoF	The zebrafish (Danio rerio) larvae used in this study were generated from crosses of adults carrying the nf1aΔ5 and nf1b+10 mutant alleles	Visual startle habituation	Dark-flash habituation; To measure visual short-term habituation, a series of 40 1 s dark flashes were delivered. Stimuli 1–10 were delivered with 30 s ISIs and stimuli 11–40 were delivered with 3 s ISIs. The percentage of habituation was calculated by dividing the mean O-bend responsiveness to stimuli 31–40 by the mean O-bend responsiveness to stimuli 1–10, subtracting this value from 1, and mul…	PMID:25176649_2014_Wolman_Epstein	Yes
NR3C1	nr3c1	Danio rerio	LoF	homozygous gr[s357] mutants; generates a strong hypomorph or null allele of GR.	Habituation to novel environment	Habituation to mildly anxiogenic environment; novel tank freezing & swimming behavior during 10 minutes	PMID:22641177_2013_Ziv_Baier	Yes
OPCML	ntm	Danio rerio	Predicted LoF	CRISPR induced truncating mutation: a308	Mechanosensory habituation	Tap Habituation	PMID:30929901_2019_Thyme_Schier	Yes
PAPPA	pappaa	Danio rerio	LoF	mutant p170 premature stop	Acoustic startle habituation	Gene locus described in paper. Short-term habituation to repetitive acoustic stimuli; 5 dpf larvae were first exposed to ten acoustic stimuli separated by a 20 s interstimulus interval (ISI) to determine baseline startle responsiveness, and then were given 30 acoustic stimuli with a 1 s ISI to evaluate habituation	PMID:25754827_2015_Wolman_Granato	Yes
PC	pcxa	Danio rerio	LoF	mutant p171 premature stop	Acoustic startle habituation	Gene locus described in paper. Short-term habituation to repetitive acoustic stimuli; 5 dpf larvae were first exposed to ten acoustic stimuli separated by a 20 s interstimulus interval (ISI) to determine baseline startle responsiveness, and then were given 30 acoustic stimuli with a 1 s ISI to evaluate habituation	PMID:25754827_2015_Wolman_Granato	Yes
SATB1	satb1a	Danio rerio	Predicted LoF	CRISPR induced truncating mutation: a321	Mechanosensory habituation	Tap Habituation	PMID:30929901_2019_Thyme_Schier	Yes
SBNO1	sbno1	Danio rerio	Predicted LoF	CRISPR induced truncating mutation: a214	Mechanosensory habituation	Tap Habituation	PMID:30929901_2019_Thyme_Schier	Yes
SHISA9	shisa9a	Danio rerio	Predicted LoF	CRISPR induced truncating mutation: a218	Mechanosensory habituation	Tap Habituation	PMID:30929901_2019_Thyme_Schier	Yes
SHISA9	shisa9b	Danio rerio	Predicted LoF	CRISPR induced truncating mutation: a219	Mechanosensory habituation	Tap Habituation	PMID:30929901_2019_Thyme_Schier	Yes
SLC32A1	slc32a1	Danio rerio	Predicted LoF	CRISPR induced truncating mutation: a332	Mechanosensory habituation	Tap Habituation	PMID:30929901_2019_Thyme_Schier	Yes
SYNGAP1	syngap1a	Danio rerio	Predicted LoF	CRISPR induced truncating mutation: a370	Mechanosensory habituation	Tap Habituation	PMID:30929901_2019_Thyme_Schier	Yes
SYNGAP1	syngap1b	Danio rerio	Predicted LoF	CRISPR induced truncating mutation: a371	Mechanosensory habituation	Tap Habituation	PMID:30929901_2019_Thyme_Schier	Yes
TCF4	tcf4	Danio rerio	Predicted LoF	CRISPR induced truncating mutation: a215	Mechanosensory habituation	Tap Habituation	PMID:30929901_2019_Thyme_Schier	Yes
TLE3	tle3a	Danio rerio	Predicted LoF	CRISPR induced truncating mutation: a349	Mechanosensory habituation	Tap Habituation	PMID:30929901_2019_Thyme_Schier	Yes
TLE3	tle3b	Danio rerio	Predicted LoF	CRISPR induced truncating mutation: a350	Mechanosensory habituation	Tap Habituation	PMID:30929901_2019_Thyme_Schier	Yes
ZDHHC17	zdhhc17	Danio rerio	LoF	mutant p174 premature stop	Acoustic startle habituation	Gene locus not yet identified at time of publication. Short-term habituation to repetitive acoustic stimuli	PMID:25754827_2015_Wolman_Granato	Yes
ACVR1; ACVRL1	sax	Drosophila melanogaster	LoF	Pan-neuronal knockdown (elav-Gal4 UAS-RNAi)	Visual startle habituation	Habituation of the jump response to light-off startle stimuli; 100 trials with 1s inter-trial interval.	PMID:31272685_2019_Fenckova_Schenck	Yes
ADCY1	rut	Drosophila melanogaster	LoF	rut[1] mutant	Habituation to electrical stimulation	Giant fiber response; lectrodes in eyes (0.1 msec pulse). Results for mutant alleles within each locus (rut or dnc) have been pooled in figures and tables because they did not differ significantly.	PMID:8627381_1996_Engel_Wu	Yes
ADCY1	rut	Drosophila melanogaster	LoF	rut[2080] homozygotes	Olfactory startle habituation	Olfactory jump reflex habituation. Each training trial consisted of a four-second odor presentation with varying inter-trial interval (ITI). Response to odorant was monitored as to whether or not the fly jumped during the four-second odor presentation or in the following three seconds and deemed habituated when it failed to jump in four consecutive trials (no-jump criterion). A habituation score …	PMID:17464794_2007_Asztalos_Tully	Yes
ADCY1	rut	Drosophila melanogaster	LoF	rut[2080] homozygotes	Olfactory habituation	Olfactory avoidance in y-maze	PMID:21795607_2011_Das_Ramaswami	Yes
ADCY1	rut	Drosophila melanogaster	Unknown	rutabaga [ps511] mutant	Gustatory habituation	Habituation of the proboscis extension reflex. Habituation was tested using 10-min intervals between the initial test, habituating stimulus, and final test. Flies were tested in groups of 10-16 and each stimulus was applied to all the flies in order. Each fly was used for only one habituation sequence.	PMID:6808513_1982_Duerr_Quinn	Yes
ADCY1	rut	Drosophila melanogaster	LoF	y rut[2] mutant	Habituation to electrical stimulation	Giant fiber response; lectrodes in eyes (0.1 msec pulse). Results for mutant alleles within each locus (rut or dnc) have been pooled in figures and tables because they did not differ significantly.	PMID:8627381_1996_Engel_Wu	Yes
ADK	adk2	Drosophila melanogaster	LoF	Pan-neuronal knockdown (elav-Gal4 UAS-RNAi)	Visual startle habituation	Habituation of the jump response to light-off startle stimuli; 100 trials with 1s inter-trial interval.	PMID:31272685_2019_Fenckova_Schenck	Yes
ALG1	CG18012	Drosophila melanogaster	LoF	Pan-neuronal knockdown (elav-Gal4 UAS-RNAi)	Visual startle habituation	Habituation of the jump response to light-off startle stimuli; 100 trials with 1s inter-trial interval.	PMID:31272685_2019_Fenckova_Schenck	Yes
ALG9	Alg9; CG11851	Drosophila melanogaster	LoF	Pan-neuronal knockdown (elav-Gal4 UAS-RNAi)	Visual startle habituation	Habituation of the jump response to light-off startle stimuli; 100 trials with 1s inter-trial interval.	PMID:31272685_2019_Fenckova_Schenck	Yes
AP1S1/2/3	AP-1sigma	Drosophila melanogaster	LoF	Pan-neuronal knockdown (elav-Gal4 UAS-RNAi)	Visual startle habituation	Habituation of the jump response to light-off startle stimuli; 100 trials with 1s inter-trial interval.	PMID:31272685_2019_Fenckova_Schenck	Yes
AP3B1/2	rb	Drosophila melanogaster	LoF	Pan-neuronal knockdown (elav-Gal4 UAS-RNAi)	Visual startle habituation	Habituation of the jump response to light-off startle stimuli; 100 trials with 1s inter-trial interval.	PMID:31272685_2019_Fenckova_Schenck	Yes
APTX	CG5316	Drosophila melanogaster	LoF	Pan-neuronal knockdown (elav-Gal4 UAS-RNAi)	Visual startle habituation	Habituation of the jump response to light-off startle stimuli; 100 trials with 1s inter-trial interval.	PMID:31272685_2019_Fenckova_Schenck	Yes
ARHGEF6/7	RtGEF	Drosophila melanogaster	LoF	Pan-neuronal knockdown (elav-Gal4 UAS-RNAi)	Visual startle habituation	Habituation of the jump response to light-off startle stimuli; 100 trials with 1s inter-trial interval.	PMID:31272685_2019_Fenckova_Schenck	Yes
ARX; ALX1/3/4	al	Drosophila melanogaster	LoF	Pan-neuronal knockdown (elav-Gal4 UAS-RNAi)	Visual startle habituation	Habituation of the jump response to light-off startle stimuli; 100 trials with 1s inter-trial interval.	PMID:31272685_2019_Fenckova_Schenck	Yes
ASL	Argl; CG9510	Drosophila melanogaster	LoF	Pan-neuronal knockdown (elav-Gal4 UAS-RNAi)	Visual startle habituation	Habituation of the jump response to light-off startle stimuli; 100 trials with 1s inter-trial interval.	PMID:31272685_2019_Fenckova_Schenck	Yes
ASPM	asp	Drosophila melanogaster	LoF	Pan-neuronal knockdown (elav-Gal4 UAS-RNAi)	Visual startle habituation	Habituation of the jump response to light-off startle stimuli; 100 trials with 1s inter-trial interval.	PMID:31272685_2019_Fenckova_Schenck	Yes
ATP7A/B	ATP7	Drosophila melanogaster	LoF	Pan-neuronal knockdown (elav-Gal4 UAS-RNAi)	Visual startle habituation	Habituation of the jump response to light-off startle stimuli; 100 trials with 1s inter-trial interval.	PMID:31272685_2019_Fenckova_Schenck	Yes
ATRX	XNP	Drosophila melanogaster	LoF	Pan-neuronal knockdown (elav-Gal4 UAS-RNAi)	Visual startle habituation	Habituation of the jump response to light-off startle stimuli; 100 trials with 1s inter-trial interval.	PMID:31272685_2019_Fenckova_Schenck	Yes
ATXN2L; ATXN2	Atx2	Drosophila melanogaster	LoF	knockdown of Drosophila atx2 in PN (olfactory projection neurons)	Olfactory habituation	Olfactory long-term habituation (olfactory avoidance)	PMID: 21795609_2011_McCann_Ramaswami	Yes
ATXN2L; ATXN2	Atx2	Drosophila melanogaster	LoF	loss of cIDR from Atx2; ΔcIDR mutant animals	Olfactory habituation	Olfactory long-term habituation (olfactory avoidance)	PMID:29772202_2018_Bakthavachalu_Ramaswami	Yes
ATXN2L; ATXN2	Atx2	Drosophila melanogaster	LoF	loss of the mIDR from Atx2; ΔmIDR mutant animals	Olfactory habituation	Olfactory long-term habituation (olfactory avoidance)	PMID:29772202_2018_Bakthavachalu_Ramaswami	Yes
BLOC1S1	Blos1	Drosophila melanogaster	LoF	Blos1[ex2] null allele	Olfactory habituation	Short-term olfactory habituation (reduced avoidance)	PMID:25568125_2015_Mullin_Faundez	Yes
BLOC1S1	Blos1	Drosophila melanogaster	LoF	Blos1[ex65] null allele	Olfactory habituation	Short-term olfactory habituation (reduced avoidance)	PMID:25568125_2015_Mullin_Faundez	Yes
BLOC1S1	Blos1	Drosophila melanogaster	LoF	Blos1[EY06269] null allele	Olfactory habituation	Short-term olfactory habituation (reduced avoidance)	PMID:25568125_2015_Mullin_Faundez	Yes
BOD1	BOD1; CG5514	Drosophila melanogaster	LoF	Pan-neuronal knockdown (elav-Gal4 UAS-RNAi)	Visual startle habituation	Habituation of the jump response to light-off startle stimuli; 100 trials with 1s inter-trial interval.	PMID:27166630_2016_Esmaeeli-Nieh_Kuss	Yes
BRAF; ARAF; RAF1	Raf	Drosophila melanogaster	LoF	Knockdown in cholinergic neurons (ChAT-Gal4 UAS-RNAi)	Visual startle habituation	Habituation of the jump response to light-off startle stimuli; 100 trials with 1s inter-trial interval.	PMID:31272685_2019_Fenckova_Schenck	Yes
BRAF; ARAF; RAF1	Raf	Drosophila melanogaster	GoF	Overexpression in GABAergic neurons (Gad1-Gal4 UAS-RafGoF)	Visual startle habituation	Habituation of the jump response to light-off startle stimuli; 100 trials with 1s inter-trial interval.	PMID:31272685_2019_Fenckova_Schenck	Yes
CACNA1H/I/J	Ca-alpha1T	Drosophila melanogaster	LoF	Pan-neuronal knockdown (elav-Gal4 UAS-RNAi)	Visual startle habituation	Habituation of the jump response to light-off startle stimuli; 100 trials with 1s inter-trial interval.	PMID:31272685_2019_Fenckova_Schenck	Yes
CAMTA1/2	Camta	Drosophila melanogaster	Unknown	P-element insertion; no further charaterisation of these mutants done	Olfactory startle habituation	The flies’ gradual decline of a locomotor startle response to short exposures of vaporized ethanol is measured using an automated video tracking systemolfactory-mediated startle response (ethanol vapor). The flies were administered the first 30-second pulse of vaporized ethanol (P1); subsequent 30-second pulses of ethanol vapor were administered every 5 minutes. One minute after the forth pulse (…	PMID:23284741_2012_Eddison_Heberlein	Yes
CASK	CASK	Drosophila melanogaster	LoF	Null mutant	Courtship habituation	Habituation assays used immature Canton-S males as trainers and testes and a training period of 30 min. Habituation to a courship stimulating cue can be demonstated after training with immature males.	PMID:14687552_2003_Lu_Griffith	Yes
CASK	CASK	Drosophila melanogaster	LoF	Pan-neuronal knockdown (elav-Gal4 UAS-RNAi)	Visual startle habituation	Habituation of the jump response to light-off startle stimuli; 100 trials with 1s inter-trial interval.	PMID:31272685_2019_Fenckova_Schenck	Yes
CASP2	Dronc	Drosophila melanogaster	LoF	Pan-neuronal knockdown (elav-Gal4 UAS-RNAi)	Visual startle habituation	Habituation of the jump response to light-off startle stimuli; 100 trials with 1s inter-trial interval.	PMID:31272685_2019_Fenckova_Schenck	Yes
CBS; CBSL	Cbs	Drosophila melanogaster	LoF	Pan-neuronal knockdown (elav-Gal4 UAS-RNAi)	Visual startle habituation	Habituation of the jump response to light-off startle stimuli; 100 trials with 1s inter-trial interval.	PMID:31272685_2019_Fenckova_Schenck	Yes
CC2D2A/B	CG43370 (Cc2d2a)	Drosophila melanogaster	LoF	Pan-neuronal knockdown (elav-Gal4 UAS-RNAi)	Visual startle habituation	Habituation of the jump response to light-off startle stimuli; 100 trials with 1s inter-trial interval.	PMID:31272685_2019_Fenckova_Schenck	Yes
CDC42BPA/B/G; DMPK	gek	Drosophila melanogaster	LoF	Pan-neuronal knockdown (elav-Gal4 UAS-RNAi)	Visual startle habituation	Habituation of the jump response to light-off startle stimuli; 100 trials with 1s inter-trial interval.	PMID:31272685_2019_Fenckova_Schenck	Yes
CEP290	cep290; CG13889	Drosophila melanogaster	LoF	Pan-neuronal knockdown (elav-Gal4 UAS-RNAi)	Visual startle habituation	Habituation of the jump response to light-off startle stimuli; 100 trials with 1s inter-trial interval.	PMID:31272685_2019_Fenckova_Schenck	Yes
CEP89	Cep89	Drosophila melanogaster	LoF	Cep89[RNAi101132] (pan-neuronal)	Visual startle habituation	Habituation of the jump response to light-off startle stimuli; 100 trials with 1s inter-trial interval.	PMID:23575228_2013_vanBon_Schenck	Yes
CNTNAP1/2/3/3B/4/5	Nrx-IV	Drosophila melanogaster	Unknown	P-element insertion; no further charaterisation of these mutants done	Olfactory startle habituation	The flies’ gradual decline of a locomotor startle response to short exposures of vaporized ethanol is measured using an automated video tracking systemolfactory-mediated startle response (ethanol vapor). The flies were administered the first 30-second pulse of vaporized ethanol (P1); subsequent 30-second pulses of ethanol vapor were administered every 5 minutes. One minute after the forth pulse (…	PMID:23284741_2012_Eddison_Heberlein	Yes
COG7	Cog7	Drosophila melanogaster	LoF	Pan-neuronal knockdown (elav-Gal4 UAS-RNAi)	Visual startle habituation	Habituation of the jump response to light-off startle stimuli; 100 trials with 1s inter-trial interval.	PMID:31272685_2019_Fenckova_Schenck	Yes
COX10	CG5037	Drosophila melanogaster	LoF	Pan-neuronal knockdown (elav-Gal4 UAS-RNAi)	Visual startle habituation	Habituation of the jump response to light-off startle stimuli; 100 trials with 1s inter-trial interval.	PMID:31272685_2019_Fenckova_Schenck	Yes
CRBN	ohgt; CG3925	Drosophila melanogaster	LoF	Pan-neuronal knockdown (elav-Gal4 UAS-RNAi)	Visual startle habituation	Habituation of the jump response to light-off startle stimuli; 100 trials with 1s inter-trial interval.	PMID:31272685_2019_Fenckova_Schenck	Yes
DHH; SHH; IHH	hh	Drosophila melanogaster	LoF	Pan-neuronal knockdown (elav-Gal4 UAS-RNAi)	Visual startle habituation	Habituation of the jump response to light-off startle stimuli; 100 trials with 1s inter-trial interval.	PMID:31272685_2019_Fenckova_Schenck	Yes
DLG1/2/3/4	dlg1	Drosophila melanogaster	LoF	Pan-neuronal knockdown (elav-Gal4 UAS-RNAi)	Visual startle habituation	Habituation of the jump response to light-off startle stimuli; 100 trials with 1s inter-trial interval.	PMID:31272685_2019_Fenckova_Schenck	Yes
DLG1/2/3/4	dlg1	Drosophila melanogaster	LoF	Pan-neuronal knockdown (elav-Gal4 UAS-RNAi)	Visual startle habituation	Habituation of the jump response to light-off startle stimuli; 100 trials with 1s inter-trial interval.	PMID:28191889_2017_Stessman_Eichler	Yes
DPYD	su(r)	Drosophila melanogaster	LoF	Pan-neuronal knockdown (elav-Gal4 UAS-RNAi)	Visual startle habituation	Habituation of the jump response to light-off startle stimuli; 100 trials with 1s inter-trial interval.	PMID:31272685_2019_Fenckova_Schenck	Yes
DTNBP1	dysb	Drosophila melanogaster	LoF	dysb[1/Df] null allele; RNAi-mediated knckodown	Olfactory habituation	Short-term olfactory habituation (reduced avoidance)	PMID:25568125_2015_Mullin_Faundez	Yes
DTNBP1	dysb	Drosophila melanogaster	LoF	dysb[1] null allele; RNAi-mediated knockdown	Olfactory habituation	Short-term olfactory habituation (reduced avoidance)	PMID:25568125_2015_Mullin_Faundez	Yes
EHMT1/2	G9a	Drosophila melanogaster	LoF	LoF mutant P-element insertion	Visual startle habituation	Habituation of the jump response to light-off startle stimuli; 100 trials with 1s inter-trial interval.	PMID:21245904_2011_Kramer_Schenck	Yes
EHMT1/2	G9a	Drosophila melanogaster	LoF	Pan-neuronal knockdown (elav-Gal4 UAS-RNAi)	Visual startle habituation	Habituation of the jump response to light-off startle stimuli; 100 trials with 1s inter-trial interval. LoF mutant habituation deficit published previously here: PMID:21245904_2011_Kramer_Schenck	PMID:31272685_2019_Fenckova_Schenck	Yes
EIF2AK3	PEK	Drosophila melanogaster	LoF	Pan-neuronal knockdown (elav-Gal4 UAS-RNAi)	Visual startle habituation	Habituation of the jump response to light-off startle stimuli; 100 trials with 1s inter-trial interval.	PMID:31272685_2019_Fenckova_Schenck	Yes
EP400; SRCAP	dom	Drosophila melanogaster	LoF	Pan-neuronal knockdown (elav-Gal4 UAS-RNAi)	Visual startle habituation	Habituation of the jump response to light-off startle stimuli; 100 trials with 1s inter-trial interval.	PMID:28191889_2017_Stessman_Eichler	Yes
ERCC2	Xpd	Drosophila melanogaster	LoF	Pan-neuronal knockdown (elav-Gal4 UAS-RNAi)	Visual startle habituation	Habituation of the jump response to light-off startle stimuli; 100 trials with 1s inter-trial interval.	PMID:31272685_2019_Fenckova_Schenck	Yes
FKRP	CG15651	Drosophila melanogaster	LoF	Pan-neuronal knockdown (elav-Gal4 UAS-RNAi)	Visual startle habituation	Habituation of the jump response to light-off startle stimuli; 100 trials with 1s inter-trial interval.	PMID:31272685_2019_Fenckova_Schenck	Yes
FMR1; FXR1/2	Fmr1	Drosophila melanogaster	LoF	Fmr1[3] LoF allele	Olfactory habituation	Olfactory long term habituation but not short term affected. Refer to earlier phenotyped Atx2 mutant - phenotypes are recapilutated in double heterozygotes with a few interactors	PMID:24344294_2014_Sudhakaran_Ramaswami	Yes
FMR1; FXR1/2	Fmr1	Drosophila melanogaster	LoF	Fmr1[B55] LoF allele	Olfactory habituation	Olfactory long term habituation but not short term affected. Refer to earlier phenotyped Atx2 mutant - phenotypes are recapilutated in double heterozygotes with a few interactors	PMID:24344294_2014_Sudhakaran_Ramaswami	Yes
FMR1; FXR1/2	Fmr1	Drosophila melanogaster	LoF	Pan-neuronal knockdown (elav-Gal4 UAS-RNAi)	Visual startle habituation	Habituation of the jump response to light-off startle stimuli; 100 trials with 1s inter-trial interval.	PMID:31272685_2019_Fenckova_Schenck	Yes
FOXP1/2/4	FoxP	Drosophila melanogaster	LoF	Pan-neuronal knockdown (elav-Gal4 UAS-RNAi)	Visual startle habituation	Habituation of the jump response to light-off startle stimuli; 100 trials with 1s inter-trial interval.	PMID:31272685_2019_Fenckova_Schenck	Yes
FOXP1/2/4	FoxP	Drosophila melanogaster	LoF	Pan-neuronal knockdown (elav-Gal4 UAS-RNAi)	Visual startle habituation	Habituation of the jump response to light-off startle stimuli; 100 trials with 1s inter-trial interval.	PMID:30753188_2019_Castells-Nobau_Schenck	Yes
FOXP1/2/4	FoxP	Drosophila melanogaster	LoF	Transheterozygous FoxP-/5-SZ-3955 animals	Visual startle habituation	Habituation of the jump response to light-off startle stimuli; 100 trials with 1s inter-trial interval.	PMID:30753188_2019_Castells-Nobau_Schenck	Yes
FOXP1/2/4	FoxP	Drosophila melanogaster	LoF	ubiqutous knockdown	Visual startle habituation	Habituation of the jump response to light-off startle stimuli; 100 trials with 1s inter-trial interval.	PMID:30753188_2019_Castells-Nobau_Schenck	Yes
GABRB1/2/3	Lcch3	Drosophila melanogaster	LoF	Pan-neuronal knockdown (elav-Gal4 UAS-RNAi)	Visual startle habituation	Habituation of the jump response to light-off startle stimuli; 100 trials with 1s inter-trial interval.	PMID:28191889_2017_Stessman_Eichler	Yes
GAD1/2	Gad1	Drosophila melanogaster	LoF	Pan-neuronal knockdown (elav-Gal4 UAS-RNAi)	Visual startle habituation	Habituation of the jump response to light-off startle stimuli; 100 trials with 1s inter-trial interval.	PMID:31272685_2019_Fenckova_Schenck	Yes
GALE	Gale	Drosophila melanogaster	LoF	Pan-neuronal knockdown (elav-Gal4 UAS-RNAi)	Visual startle habituation	Habituation of the jump response to light-off startle stimuli; 100 trials with 1s inter-trial interval.	PMID:31272685_2019_Fenckova_Schenck	Yes
GALT	Galt	Drosophila melanogaster	LoF	Pan-neuronal knockdown (elav-Gal4 UAS-RNAi)	Visual startle habituation	Habituation of the jump response to light-off startle stimuli; 100 trials with 1s inter-trial interval.	PMID:31272685_2019_Fenckova_Schenck	Yes
GATAD2A/B	simj	Drosophila melanogaster	LoF	Pan-neuronal knockdown (elav-Gal4 UAS-RNAi)	Visual startle habituation	Habituation of the jump response to light-off startle stimuli; 100 trials with 1s inter-trial interval.	PMID:31272685_2019_Fenckova_Schenck	Yes
GATAD2A/B	simj	Drosophila melanogaster	LoF	Pan-neuronal knockdown (elav-Gal4 UAS-RNAi)	Visual startle habituation	Habituation of the jump response to light-off startle stimuli; 100 trials with 1s inter-trial interval.	PMID:23644463_2013_Willemsen_Kleefstra	Yes
GCSH	ppl	Drosophila melanogaster	LoF	Pan-neuronal knockdown (elav-Gal4 UAS-RNAi)	Visual startle habituation	Habituation of the jump response to light-off startle stimuli; 100 trials with 1s inter-trial interval.	PMID:31272685_2019_Fenckova_Schenck	Yes
GDI1/2	Gdi	Drosophila melanogaster	LoF	Pan-neuronal knockdown (elav-Gal4 UAS-RNAi)	Visual startle habituation	Habituation of the jump response to light-off startle stimuli; 100 trials with 1s inter-trial interval.	PMID:31272685_2019_Fenckova_Schenck	Yes
GIGYF1/2	Gyf; CG11148	Drosophila melanogaster	LoF	Pan-neuronal knockdown (elav-Gal4 UAS-RNAi)	Visual startle habituation	Habituation of the jump response to light-off startle stimuli; 100 trials with 1s inter-trial interval.	PMID:28191889_2017_Stessman_Eichler	Yes
GK/2	Gyk	Drosophila melanogaster	LoF	Pan-neuronal knockdown (elav-Gal4 UAS-RNAi)	Visual startle habituation	Habituation of the jump response to light-off startle stimuli; 100 trials with 1s inter-trial interval.	PMID:31272685_2019_Fenckova_Schenck	Yes
GLDC	G3999	Drosophila melanogaster	LoF	Pan-neuronal knockdown (elav-Gal4 UAS-RNAi)	Visual startle habituation	Habituation of the jump response to light-off startle stimuli; 100 trials with 1s inter-trial interval.	PMID:31272685_2019_Fenckova_Schenck	Yes
GLI1/2/3	ci	Drosophila melanogaster	LoF	Pan-neuronal knockdown (elav-Gal4 UAS-RNAi)	Visual startle habituation	Habituation of the jump response to light-off startle stimuli; 100 trials with 1s inter-trial interval.	PMID:31272685_2019_Fenckova_Schenck	Yes
GLIPR2	CG4270	Drosophila melanogaster	LoF	Pan-neuronal knockdown (elav-Gal4 UAS-RNAi)	Visual startle habituation	Habituation of the jump response to light-off startle stimuli; 100 trials with 1s inter-trial interval.	PMID:31272685_2019_Fenckova_Schenck	Yes
GPC3/5	dally	Drosophila melanogaster	LoF	Pan-neuronal knockdown (elav-Gal4 UAS-RNAi)	Visual startle habituation	Habituation of the jump response to light-off startle stimuli; 100 trials with 1s inter-trial interval.	PMID:31272685_2019_Fenckova_Schenck	Yes
GPHN	cin	Drosophila melanogaster	LoF	Pan-neuronal knockdown (elav-Gal4 UAS-RNAi)	Visual startle habituation	Habituation of the jump response to light-off startle stimuli; 100 trials with 1s inter-trial interval.	PMID:31272685_2019_Fenckova_Schenck	Yes
GRIK2/3	CG3822 (KaiR1D)	Drosophila melanogaster	LoF	Pan-neuronal knockdown (elav-Gal4 UAS-RNAi)	Visual startle habituation	Habituation of the jump response to light-off startle stimuli; 100 trials with 1s inter-trial interval.	PMID:31272685_2019_Fenckova_Schenck	Yes
GRIN2A/B/C/D	Nmdar2	Drosophila melanogaster	LoF	Pan-neuronal knockdown (elav-Gal4 UAS-RNAi)	Visual startle habituation	Habituation of the jump response to light-off startle stimuli; 100 trials with 1s inter-trial interval.	PMID:28191889_2017_Stessman_Eichler	Yes
GSK3A/B	sgg	Drosophila melanogaster	LoF	LOF mutant alleles of sgg; sgg[twkr] (sgg disrupted by insertion)	Olfactory startle habituation	After a brief acclimation period in the booz-o-mat test apparatus, flies were given 30-sec pulses of ethanol vapor (ethanol/humidified air ratio of 70/80, where 70 units of flux is equivalent to 2.4 liter/min) at 6-min intervals.	PMID:17360579_2007_Wolf_Heberlein	Yes
GSK3A/B	sgg	Drosophila melanogaster	LoF	LOF mutant alleles of sgg; sggÊ6 deletion (imprecise P-element excision)	Olfactory startle habituation	After a brief acclimation period in the booz-o-mat test apparatus, flies were given 30-sec pulses of ethanol vapor (ethanol/humidified air ratio of 70/80, where 70 units of flux is equivalent to 2.4 liter/min) at 6-min intervals.	PMID:17360579_2007_Wolf_Heberlein	Yes
HCN1/2/3/4	Ih	Drosophila melanogaster	LoF	Pan-neuronal knockdown (elav-Gal4 UAS-RNAi)	Visual startle habituation	Habituation of the jump response to light-off startle stimuli; 100 trials with 1s inter-trial interval.	PMID:31272685_2019_Fenckova_Schenck	Yes
HRAS; KRAS; NRAS	Ras58D	Drosophila melanogaster	GoF	Heterozygous Ras1[R68Q] mutant; Ras overexpression through addition of constitutively active form	Visual startle habituation	Habituation of the jump response to light-off startle stimuli; 100 trials with 1s inter-trial interval.	PMID:31272685_2019_Fenckova_Schenck	Yes
HRAS; KRAS; NRAS	Ras58D	Drosophila melanogaster	LoF	Knockdown in cholinergic neurons (ChAT-Gal4 UAS-RNAi)	Visual startle habituation	Habituation of the jump response to light-off startle stimuli; 100 trials with 1s inter-trial interval.	PMID:31272685_2019_Fenckova_Schenck	Yes
HRAS; KRAS; NRAS	Ras58D	Drosophila melanogaster	GoF	Overexpression in GABAergic neurons (Gad1-Gal4 UAS-Ras1R68Q)	Visual startle habituation	Habituation of the jump response to light-off startle stimuli; 100 trials with 1s inter-trial interval.	PMID:31272685_2019_Fenckova_Schenck	Yes
HRAS; KRAS; NRAS	Ras58D	Drosophila melanogaster	GoF	Pan-neuronal overexpression of Ras1 [R68Q]	Visual startle habituation	Habituation of the jump response to light-off startle stimuli; 100 trials with 1s inter-trial interval.	PMID:31272685_2019_Fenckova_Schenck	Yes
HSD17B10	scu	Drosophila melanogaster	LoF	Pan-neuronal knockdown (elav-Gal4 UAS-RNAi)	Visual startle habituation	Habituation of the jump response to light-off startle stimuli; 100 trials with 1s inter-trial interval.	PMID:31272685_2019_Fenckova_Schenck	Yes
KCNA1/2/3/4/5/6/7/10	Sh	Drosophila melanogaster	LoF	Shaker [133] null mutant; affects the pore forming region, eliminates the current and prolongs action potentials in the giant fiber	Olfactory startle habituation	Habituation of the olfactory-jump response: A 4 s odor pulse stimulus was given with a 60 s intertrial interval. A response was recorded if the fly jumped within 4 s of the odor pulse. Habituation occurred when a criterion of 4 failures to jump in response to 4 consecutive odor pulses was reached. Habituation is expressed as a habituation index defined as the number of trials to criterion (TTC). …	PMID:17464797_2007_Joiner_Wu	Yes
KCNA1/2/3/4/5/6/7/10	Sh	Drosophila melanogaster	GoF	Shaker [5] neomorph mutant; alters current properties and induces repetitive firing in the giant fiber pathway &	Olfactory startle habituation	Habituation of the olfactory-jump response: A 4 s odor pulse stimulus was given with a 60 s intertrial interval. A response was recorded if the fly jumped within 4 s of the odor pulse. Habituation occurred when a criterion of 4 failures to jump in response to 4 consecutive odor pulses was reached. Habituation is expressed as a habituation index defined as the number of trials to criterion (TTC). …	PMID:17464797_2007_Joiner_Wu	Yes
KCNAB1/2/3	Hk	Drosophila melanogaster	LoF	Hk[IE18]	Habituation to electrical stimulation	Giant fiber response - electrodes in eyes (stimuli 0.2-0.4V - see Engel & Wu, 1996); The rate of habituation of the giant fiber escape pathway is reduced and attainment of five consecutive failures is delayed in HkIE18 (Loss-of-Function) flies compared to wild-type	PMID:9482810_1998_Engel_Wu	Yes
KCNAB1/2/3	Hk	Drosophila melanogaster	LoF	Hyperkinetic [1]/[2] mutant; severe point mutations	Olfactory startle habituation	Habituation of the olfactory-jump response: A 4 s odor pulse stimulus was given with a 60 s intertrial interval. A response was recorded if the fly jumped within 4 s of the odor pulse. Habituation occurred when a criterion of 4 failures to jump in response to 4 consecutive odor pulses was reached. Habituation is expressed as a habituation index defined as the number of trials to criterion (TTC). …	PMID:17464797_2007_Joiner_Wu	Yes
KCNK3/9/15	Task7	Drosophila melanogaster	LoF	Pan-neuronal knockdown (elav-Gal4 UAS-RNAi)	Visual startle habituation	Habituation of the jump response to light-off startle stimuli; 100 trials with 1s inter-trial interval.	PMID:31272685_2019_Fenckova_Schenck	Yes
KCNMA1/KCNU1	slo	Drosophila melanogaster	LoF	slo[1] amporphic alleles	Habituation to electrical stimulation	Giant fiber response; electrodes in eyes (stimuli 0.2-0.4V - see Engel & Wu, 1996)	PMID:9482810_1998_Engel_Wu	Yes
KCNMA1/KCNU1	slo	Drosophila melanogaster	LoF	slo[98] amporphic alleles	Habituation to electrical stimulation	Giant fiber response; electrodes in eyes (stimuli 0.2-0.4V - see Engel & Wu, 1996)	PMID:9482810_1998_Engel_Wu	Yes
KCNMA1/KCNU1	slo	Drosophila melanogaster	LoF	slowpoke [98] null mutant; functional null allele	Olfactory startle habituation	Habituation of the olfactory-jump response: A 4 s odor pulse stimulus was given with a 60 s intertrial interval. A response was recorded if the fly jumped within 4 s of the odor pulse. Habituation occurred when a criterion of 4 failures to jump in response to 4 consecutive odor pulses was reached. Habituation is expressed as a habituation index defined as the number of trials to criterion (TTC). …	PMID:17464797_2007_Joiner_Wu	Yes
KDM5A/B/C/D	lid	Drosophila melanogaster	LoF	Pan-neuronal knockdown (elav-Gal4 UAS-RNAi)	Visual startle habituation	Habituation of the jump response to light-off startle stimuli; 100 trials with 1s inter-trial interval.	PMID:31272685_2019_Fenckova_Schenck	Yes
KMT5B/C	Hmt4-20	Drosophila melanogaster	LoF	Pan-neuronal knockdown (elav-Gal4 UAS-RNAi)	Visual startle habituation	Habituation of the jump response to light-off startle stimuli; 100 trials with 1s inter-trial interval.	PMID:28191889_2017_Stessman_Eichler	Yes
LAMA1/2	wb	Drosophila melanogaster	LoF	Pan-neuronal knockdown (elav-Gal4 UAS-RNAi)	Visual startle habituation	Habituation of the jump response to light-off startle stimuli; 100 trials with 1s inter-trial interval.	PMID:31272685_2019_Fenckova_Schenck	Yes
LAMC1/2/3	LanB2	Drosophila melanogaster	LoF	Pan-neuronal knockdown (elav-Gal4 UAS-RNAi)	Visual startle habituation	Habituation of the jump response to light-off startle stimuli; 100 trials with 1s inter-trial interval.	PMID:28191889_2017_Stessman_Eichler	Yes
MANBA	beta-Man; CG12582	Drosophila melanogaster	LoF	Pan-neuronal knockdown (elav-Gal4 UAS-RNAi)	Visual startle habituation	Habituation of the jump response to light-off startle stimuli; 100 trials with 1s inter-trial interval.	PMID:31272685_2019_Fenckova_Schenck	Yes
MAP2K1/2	Mek	Drosophila melanogaster	LoF	Knockdown in cholinergic neurons (ChAT-Gal4 UAS-RNAi)	Visual startle habituation	Habituation of the jump response to light-off startle stimuli; 100 trials with 1s inter-trial interval.	PMID:31272685_2019_Fenckova_Schenck	Yes
MCPH1	MCPH1	Drosophila melanogaster	LoF	Pan-neuronal knockdown (elav-Gal4 UAS-RNAi)	Visual startle habituation	Habituation of the jump response to light-off startle stimuli; 100 trials with 1s inter-trial interval.	PMID:31272685_2019_Fenckova_Schenck	Yes
MMADHC	CG12118	Drosophila melanogaster	LoF	Pan-neuronal knockdown (elav-Gal4 UAS-RNAi)	Visual startle habituation	Habituation of the jump response to light-off startle stimuli; 100 trials with 1s inter-trial interval.	PMID:31272685_2019_Fenckova_Schenck	Yes
MOCS2	Moc2B; Mocs2	Drosophila melanogaster	LoF	Pan-neuronal knockdown (elav-Gal4 UAS-RNAi)	Visual startle habituation	Habituation of the jump response to light-off startle stimuli; 100 trials with 1s inter-trial interval.	PMID:31272685_2019_Fenckova_Schenck	Yes
MTRR	CG14882	Drosophila melanogaster	LoF	Pan-neuronal knockdown (elav-Gal4 UAS-RNAi)	Visual startle habituation	Habituation of the jump response to light-off startle stimuli; 100 trials with 1s inter-trial interval.	PMID:31272685_2019_Fenckova_Schenck	Yes
NCKAP1/L	Hem	Drosophila melanogaster	LoF	Pan-neuronal knockdown (elav-Gal4 UAS-RNAi)	Visual startle habituation	Habituation of the jump response to light-off startle stimuli; 100 trials with 1s inter-trial interval.	PMID:28191889_2017_Stessman_Eichler	Yes
NCOR1/2	Smr	Drosophila melanogaster	LoF	Pan-neuronal knockdown (elav-Gal4 UAS-RNAi)	Visual startle habituation	Habituation of the jump response to light-off startle stimuli; 100 trials with 1s inter-trial interval.	PMID:28191889_2017_Stessman_Eichler	Yes
NF1	Nf1	Drosophila melanogaster	LoF	Knockdown in GABAergic neurons (Gad1-Gal4 UAS-RNAi)	Visual startle habituation	Habituation of the jump response to light-off startle stimuli; 100 trials with 1s inter-trial interval.	PMID:31272685_2019_Fenckova_Schenck	Yes
NF1	Nf1	Drosophila melanogaster	LoF	Pan-neuronal knockdown (elav-Gal4 UAS-RNAi)	Visual startle habituation	Habituation of the jump response to light-off startle stimuli; 100 trials with 1s inter-trial interval.	PMID:31272685_2019_Fenckova_Schenck	Yes
NRXN1/2/3	Nrx-1	Drosophila melanogaster	LoF	Pan-neuronal knockdown (elav-Gal4 UAS-RNAi)	Visual startle habituation	Habituation of the jump response to light-off startle stimuli; 100 trials with 1s inter-trial interval.	PMID:31272685_2019_Fenckova_Schenck	Yes
NSD1/2/3	Mes-4	Drosophila melanogaster	LoF	Pan-neuronal knockdown (elav-Gal4 UAS-RNAi)	Visual startle habituation	Habituation of the jump response to light-off startle stimuli; 100 trials with 1s inter-trial interval.	PMID:31272685_2019_Fenckova_Schenck	Yes
NT5DC1	CG2277	Drosophila melanogaster	LoF	Pan-neuronal knockdown (elav-Gal4 UAS-RNAi)	Visual startle habituation	Habituation of the jump response to light-off startle stimuli; 100 trials with 1s inter-trial interval.	PMID:33462198_2021_Singgih_Franke	Yes
NT5DC2/3	CG1814	Drosophila melanogaster	LoF	Pan-neuronal knockdown (elav-Gal4 UAS-RNAi)	Visual startle habituation	Habituation of the jump response to light-off startle stimuli; 100 trials with 1s inter-trial interval.	PMID:33462198_2021_Singgih_Franke	Yes
OGA	Oga	Drosophila melanogaster	LoF	knockout and catalytic mutant	Visual startle habituation	Habituation of the jump response to light-off startle stimuli; 100 trials with 1s inter-trial interval.	PMID:32094227_2020_Muha_Aalten	Yes
PACS1/2	KrT95D	Drosophila melanogaster	LoF	Pan-neuronal knockdown (elav-Gal4 UAS-RNAi)	Visual startle habituation	Habituation of the jump response to light-off startle stimuli; 100 trials with 1s inter-trial interval.	PMID:31272685_2019_Fenckova_Schenck	Yes
PAK1/2/3	Pak	Drosophila melanogaster	LoF	Pan-neuronal knockdown (elav-Gal4 UAS-RNAi)	Visual startle habituation	Habituation of the jump response to light-off startle stimuli; 100 trials with 1s inter-trial interval.	PMID:31272685_2019_Fenckova_Schenck	Yes
PC	PCB; CG1516	Drosophila melanogaster	LoF	Pan-neuronal knockdown (elav-Gal4 UAS-RNAi)	Visual startle habituation	Habituation of the jump response to light-off startle stimuli; 100 trials with 1s inter-trial interval.	PMID:31272685_2019_Fenckova_Schenck	Yes
PCNT; AKAP9	Plp; cp309	Drosophila melanogaster	LoF	Pan-neuronal knockdown (elav-Gal4 UAS-RNAi)	Visual startle habituation	Habituation of the jump response to light-off startle stimuli; 100 trials with 1s inter-trial interval.	PMID:31272685_2019_Fenckova_Schenck	Yes
PDE4A/B/C/D	dnc	Drosophila melanogaster	LoF	dnc[1A] homozygotes	Olfactory startle habituation	Olfactory jump reflex habituation. Each training trial consisted of a four-second odor presentation with varying inter-trial interval (ITI). Response to odorant was monitored as to whether or not the fly jumped during the four-second odor presentation or in the following three seconds and deemed habituated when it failed to jump in four consecutive trials (no-jump criterion). A habituation score …	PMID:17464794_2007_Asztalos_Tully	Yes
PDE4A/B/C/D	dnc	Drosophila melanogaster	LoF	dnc[M14] homozygotes	Olfactory startle habituation	Olfactory jump reflex habituation. Each training trial consisted of a four-second odor presentation with varying inter-trial interval (ITI). Response to odorant was monitored as to whether or not the fly jumped during the four-second odor presentation or in the following three seconds and deemed habituated when it failed to jump in four consecutive trials (no-jump criterion). A habituation score …	PMID:17464794_2007_Asztalos_Tully	Yes
PDE4A/B/C/D	dnc	Drosophila melanogaster	LoF	dunce [1] mutant; hypomorph	Courtship habituation	Habituation deficit defined as a significantly lower courtship index of mutant versus immature males.	PMID:7993316_1994_ODell	Yes
PDE4A/B/C/D	dnc	Drosophila melanogaster	LoF	dunce [1]/[2] mutant; hypomorph	Gustatory habituation	Habituation of the proboscis extension reflex. Habituation was tested using 10-min intervals between the initial test, habituating stimulus, and final test. Flies were tested in groups of 10-16 and each stimulus was applied to all the flies in order. Each fly was used for only one habituation sequence.	PMID:6808513_1982_Duerr_Quinn	Yes
PDE4A/B/C/D	dnc	Drosophila melanogaster	LoF	Pan-neuronal knockdown (elav-Gal4 UAS-RNAi)	Visual startle habituation	Habituation of the jump response to light-off startle stimuli; 100 trials with 1s inter-trial interval.	PMID:31272685_2019_Fenckova_Schenck	Yes
PEX1	Pex1	Drosophila melanogaster	LoF	Pan-neuronal knockdown (elav-Gal4 UAS-RNAi)	Visual startle habituation	Habituation of the jump response to light-off startle stimuli; 100 trials with 1s inter-trial interval.	PMID:31272685_2019_Fenckova_Schenck	Yes
PHGDH	CG6287	Drosophila melanogaster	LoF	Pan-neuronal knockdown (elav-Gal4 UAS-RNAi)	Visual startle habituation	Habituation of the jump response to light-off startle stimuli; 100 trials with 1s inter-trial interval.	PMID:31272685_2019_Fenckova_Schenck	Yes
PIGV	PIG-V	Drosophila melanogaster	LoF	Pan-neuronal knockdown (elav-Gal4 UAS-RNAi). Gene name previously veg; now PIGV	Visual startle habituation	Habituation of the jump response to light-off startle stimuli; 100 trials with 1s inter-trial interval.	PMID:31272685_2019_Fenckova_Schenck	Yes
POGZ	row	Drosophila melanogaster	LoF	Pan-neuronal knockdown (elav-Gal4 UAS-RNAi)	Visual startle habituation	Habituation of the jump response to light-off startle stimuli; 100 trials with 1s inter-trial interval.	PMID:31272685_2019_Fenckova_Schenck	Yes
POGZ	row	Drosophila melanogaster	LoF	Pan-neuronal knockdown (elav-Gal4 UAS-RNAi)	Visual startle habituation	Habituation of the jump response to light-off startle stimuli; 100 trials with 1s inter-trial interval.	PMID:28191889_2017_Stessman_Eichler	Yes
POGZ	row	Drosophila melanogaster	LoF	Pan-neuronal knockdown (elav-Gal4 UAS-RNAi)	Visual startle habituation	Habituation of the jump response to light-off startle stimuli; 100 trials with 1s inter-trial interval.	PMID:26942287_2016_Stessman_Kleefstra	Yes
PRKG1	for	Drosophila melanogaster	GoF	for[R] (natural variant, higher expression)	Habituation to electrical stimulation	Giant fiber response; electrodes in eyes. Adult flies were held on ice for 20–30 min before being tethered to a wire mount that was glued behind the neck of the fly; the legs then were waxed into flight position. Trials were performed in darkness. Stimulating voltage pulses (0.1 ms duration) were given with electrodes in the eyes, and action potentials in flight (DLM) and jump (TTM) muscles were …	PMID:11040266_2000_Engel_Wu	Yes
PRKG1	for	Drosophila melanogaster	GoF	for[R] (natural variant, higher expression)	Gustatory habituation	Habituation of proboscis extension reflex after repeated sucrose stimulation.	PMID:15169860_2004_Scheiner_Erber	Yes
PRKG1	for	Drosophila melanogaster	GoF	overexpression of for-T1 with orco-gal4	Olfactory startle habituation	The flies’ gradual decline of a locomotor startle response to short exposures of vaporized ethanol is measured using an automated video tracking systemolfactory-mediated startle response (ethanol vapor). The flies were administered the first 30-second pulse of vaporized ethanol (P1); subsequent 30-second pulses of ethanol vapor were administered every 5 minutes. One minute after the forth pulse (…	PMID:23284741_2012_Eddison_Heberlein	Yes
PRPS1/2 & PRPS1L1	CG6767	Drosophila melanogaster	LoF	Pan-neuronal knockdown (elav-Gal4 UAS-RNAi)	Visual startle habituation	Habituation of the jump response to light-off startle stimuli; 100 trials with 1s inter-trial interval.	PMID:31272685_2019_Fenckova_Schenck	Yes
PTEN	Pten	Drosophila melanogaster	LoF	Pan-neuronal knockdown (elav-Gal4 UAS-RNAi)	Visual startle habituation	Habituation of the jump response to light-off startle stimuli; 100 trials with 1s inter-trial interval.	PMID:31272685_2019_Fenckova_Schenck	Yes
PTPN6/11	csw	Drosophila melanogaster	LoF	Knockdown in cholinergic neurons (ChAT-Gal4 UAS-RNAi)	Visual startle habituation	Habituation of the jump response to light-off startle stimuli; 100 trials with 1s inter-trial interval.	PMID:31272685_2019_Fenckova_Schenck	Yes
PTPN6/11	csw	Drosophila melanogaster	LoF	Pan-neuronal knockdown (elav-Gal4 UAS-RNAi)	Visual startle habituation	Habituation of the jump response to light-off startle stimuli; 100 trials with 1s inter-trial interval.	PMID:31272685_2019_Fenckova_Schenck	Yes
RAB39A/B	Rab39	Drosophila melanogaster	LoF	Pan-neuronal knockdown (elav-Gal4 UAS-RNAi)	Visual startle habituation	Habituation of the jump response to light-off startle stimuli; 100 trials with 1s inter-trial interval.	PMID:31272685_2019_Fenckova_Schenck	Yes
RNASEH2A	CG13690	Drosophila melanogaster	LoF	Pan-neuronal knockdown (elav-Gal4 UAS-RNAi)	Visual startle habituation	Habituation of the jump response to light-off startle stimuli; 100 trials with 1s inter-trial interval.	PMID:31272685_2019_Fenckova_Schenck	Yes
SCAPER	ssp3	Drosophila melanogaster	LoF	Pan-neuronal knockdown (elav-Gal4 UAS-RNAi)	Visual startle habituation	Habituation of the jump response to light-off startle stimuli; 100 trials with 1s inter-trial interval.	PMID:31272685_2019_Fenckova_Schenck	Yes
SHANK1/2/3	Prosap	Drosophila melanogaster	LoF	Pan-neuronal knockdown (elav-Gal4 UAS-RNAi)	Visual startle habituation	Habituation of the jump response to light-off startle stimuli; 100 trials with 1s inter-trial interval.	PMID:31272685_2019_Fenckova_Schenck	Yes
SLC16A10/2	kar	Drosophila melanogaster	LoF	Pan-neuronal knockdown (elav-Gal4 UAS-RNAi)	Visual startle habituation	Habituation of the jump response to light-off startle stimuli; 100 trials with 1s inter-trial interval.	PMID:31272685_2019_Fenckova_Schenck	Yes
SLC25A18/22	CG18347 (GC1)	Drosophila melanogaster	LoF	Pan-neuronal knockdown (elav-Gal4 UAS-RNAi)	Visual startle habituation	Habituation of the jump response to light-off startle stimuli; 100 trials with 1s inter-trial interval.	PMID:31272685_2019_Fenckova_Schenck	Yes
SLC25A2/15	CG1628	Drosophila melanogaster	LoF	Pan-neuronal knockdown (elav-Gal4 UAS-RNAi)	Visual startle habituation	Habituation of the jump response to light-off startle stimuli; 100 trials with 1s inter-trial interval.	PMID:31272685_2019_Fenckova_Schenck	Yes
SLC35C1	nac	Drosophila melanogaster	LoF	Pan-neuronal knockdown (elav-Gal4 UAS-RNAi)	Visual startle habituation	Habituation of the jump response to light-off startle stimuli; 100 trials with 1s inter-trial interval.	PMID:31272685_2019_Fenckova_Schenck	Yes
SMS	Sms; CG4300	Drosophila melanogaster	LoF	Pan-neuronal knockdown (elav-Gal4 UAS-RNAi)	Visual startle habituation	Habituation of the jump response to light-off startle stimuli; 100 trials with 1s inter-trial interval.	PMID:31272685_2019_Fenckova_Schenck	Yes
SNAP29	Snap29; usnp	Drosophila melanogaster	LoF	Pan-neuronal knockdown (elav-Gal4 UAS-RNAi)	Visual startle habituation	Habituation of the jump response to light-off startle stimuli; 100 trials with 1s inter-trial interval.	PMID:31272685_2019_Fenckova_Schenck	Yes
SOS1/2	Sos	Drosophila melanogaster	LoF	Knockdown in cholinergic neurons (ChAT-Gal4 UAS-RNAi)	Visual startle habituation	Habituation of the jump response to light-off startle stimuli; 100 trials with 1s inter-trial interval.	PMID:31272685_2019_Fenckova_Schenck	Yes
SOS1/2	Sos	Drosophila melanogaster	LoF	Pan-neuronal knockdown (elav-Gal4 UAS-RNAi)	Visual startle habituation	Habituation of the jump response to light-off startle stimuli; 100 trials with 1s inter-trial interval.	PMID:31272685_2019_Fenckova_Schenck	Yes
SPRED1/2/3	Spred	Drosophila melanogaster	LoF	Knockdown in GABAergic neurons (Gad1-Gal4 UAS-RNAi)	Visual startle habituation	Habituation of the jump response to light-off startle stimuli; 100 trials with 1s inter-trial interval.	PMID:31272685_2019_Fenckova_Schenck	Yes
SPRED1/2/3	Spred	Drosophila melanogaster	LoF	Pan-neuronal knockdown (elav-Gal4 UAS-RNAi)	Visual startle habituation	Habituation of the jump response to light-off startle stimuli; 100 trials with 1s inter-trial interval.	PMID:31272685_2019_Fenckova_Schenck	Yes
SUOX	shop; CG7280	Drosophila melanogaster	LoF	Pan-neuronal knockdown (elav-Gal4 UAS-RNAi)	Visual startle habituation	Habituation of the jump response to light-off startle stimuli; 100 trials with 1s inter-trial interval.	PMID:31272685_2019_Fenckova_Schenck	Yes
SYN1/2/3	Syn	Drosophila melanogaster	LoF	Pan-neuronal knockdown (elav-Gal4 UAS-RNAi)	Visual startle habituation	Habituation of the jump response to light-off startle stimuli; 100 trials with 1s inter-trial interval.	PMID:31272685_2019_Fenckova_Schenck	Yes
SYNGAP1; RASAL2; DAB2IP	CG42684	Drosophila melanogaster	LoF	Pan-neuronal knockdown (elav-Gal4 UAS-RNAi)	Visual startle habituation	Habituation of the jump response to light-off startle stimuli; 100 trials with 1s inter-trial interval.	PMID:28191889_2017_Stessman_Eichler	Yes
TCF3/4/12	da	Drosophila melanogaster	LoF	Pan-neuronal knockdown (elav-Gal4 UAS-RNAi)	Visual startle habituation	Habituation of the jump response to light-off startle stimuli; 100 trials with 1s inter-trial interval.	PMID:31272685_2019_Fenckova_Schenck	Yes
TCF3/4/12	da	Drosophila melanogaster	LoF	Pan-neuronal knockdown (elav-Gal4 UAS-RNAi)	Visual startle habituation	Habituation of the jump response to light-off startle stimuli; 100 trials with 1s inter-trial interval.	PMID:28191889_2017_Stessman_Eichler	Yes
TIMM8A/B	Tim8	Drosophila melanogaster	LoF	Pan-neuronal knockdown (elav-Gal4 UAS-RNAi)	Visual startle habituation	Habituation of the jump response to light-off startle stimuli; 100 trials with 1s inter-trial interval.	PMID:31272685_2019_Fenckova_Schenck	Yes
TPI1	Tpi	Drosophila melanogaster	LoF	Pan-neuronal knockdown (elav-Gal4 UAS-RNAi)	Visual startle habituation	Habituation of the jump response to light-off startle stimuli; 100 trials with 1s inter-trial interval.	PMID:31272685_2019_Fenckova_Schenck	Yes
TRPV6	iav	Drosophila melanogaster	Unknown	inactive [1] mutant	Courtship habituation	Habituation deficit defined as a significantly lower courtship index of mutant versus immature males.	PMID:7993316_1994_ODell	Yes
TSC1	Tsc1	Drosophila melanogaster	LoF	Pan-neuronal knockdown (elav-Gal4 UAS-RNAi)	Visual startle habituation	Habituation of the jump response to light-off startle stimuli; 100 trials with 1s inter-trial interval.	PMID:31272685_2019_Fenckova_Schenck	Yes
UBE2A/B	UbcD6	Drosophila melanogaster	LoF	Pan-neuronal knockdown (elav-Gal4 UAS-RNAi)	Visual startle habituation	Habituation of the jump response to light-off startle stimuli; 100 trials with 1s inter-trial interval.	PMID:31272685_2019_Fenckova_Schenck	Yes
UPB1	pyd3	Drosophila melanogaster	LoF	Pan-neuronal knockdown (elav-Gal4 UAS-RNAi)	Visual startle habituation	Habituation of the jump response to light-off startle stimuli; 100 trials with 1s inter-trial interval.	PMID:31272685_2019_Fenckova_Schenck	Yes
UPF3A/B	Upf3	Drosophila melanogaster	LoF	Pan-neuronal knockdown (elav-Gal4 UAS-RNAi)	Visual startle habituation	Habituation of the jump response to light-off startle stimuli; 100 trials with 1s inter-trial interval.	PMID:31272685_2019_Fenckova_Schenck	Yes
WAC	wcy; CG8949	Drosophila melanogaster	LoF	Pan-neuronal knockdown (elav-Gal4 UAS-RNAi)	Visual startle habituation	Habituation of the jump response to light-off startle stimuli; 100 trials with 1s inter-trial interval.	PMID:31272685_2019_Fenckova_Schenck	Yes
WAC	wcy; CG8949	Drosophila melanogaster	LoF	Pan-neuronal knockdown (elav-Gal4 UAS-RNAi)	Visual startle habituation	Habituation of the jump response to light-off startle stimuli; 100 trials with 1s inter-trial interval.	PMID:26757981_2016_Lugtenberg_Vissers	Yes
WDFY3/4	bchs	Drosophila melanogaster	LoF	Pan-neuronal knockdown (elav-Gal4 UAS-RNAi)	Visual startle habituation	Habituation of the jump response to light-off startle stimuli; 100 trials with 1s inter-trial interval.	PMID:28191889_2017_Stessman_Eichler	Yes
XPA	Xpac	Drosophila melanogaster	LoF	Pan-neuronal knockdown (elav-Gal4 UAS-RNAi)	Visual startle habituation	Habituation of the jump response to light-off startle stimuli; 100 trials with 1s inter-trial interval.	PMID:31272685_2019_Fenckova_Schenck	Yes
ZEB1/2	zfh1	Drosophila melanogaster	LoF	Pan-neuronal knockdown (elav-Gal4 UAS-RNAi)	Visual startle habituation	Habituation of the jump response to light-off startle stimuli; 100 trials with 1s inter-trial interval.	PMID:31272685_2019_Fenckova_Schenck	Yes
BDNF	-	Homo sapiens	Unknown	BDNF p.Val66Met genotype. Benign effect by ClinVar	Amygdala habituation	Habituation of amygdala BOLD response to unpleasant & pleasant emotional pictures (normal habituation to neutral pictures)	PMID:28371657_2017_Perez-Rodriguez_Hazlett	Yes
FMR1	-	Homo sapiens	LoF	17 individuals with full FMR1 mutation vs 26 controls	Event-related potential habituation	Repitition suppression to 18 different faces*10 repetition, ERPs and task induced oscillatory activity	PMID:28330777_2017_Rigoulot_Lippe	Yes
FMR1	-	Homo sapiens	LoF	FMR1 gene full mutation	Auditory event-related potential habituation	Habituation as measured by the N1 event-related potential reponse; Stimuli consisted of 150 trials; each trial consisted of a train of four 1000 Hz tones (50-ms duration). Tones within each train were separated by a 500 ms inter-stimulus interval; trials were separated by a 4000-ms interval. Tones were delivered at 65 db through headphones, while participants underwent dense array EEG. Participan…	PMID:27093069_2016_Ethridge_Sweeney	Yes
FMR1	-	Homo sapiens	LoF	FMR1 gene full mutation with methylated CGC repeat expantion > partial LoF	Auditory event-related potential habituation	Auditory habituation to stimulus (60dB above hearing threshold) sequence of four identical tones with 1s ISI and intertrain interval of 12s.	PMID:12705812_2003_Castrén_Partanen	Yes
FMR1	-	Homo sapiens	LoF	Fragile X Syndrome - full mutation; males	Acoustic habituation	Long-term habituation. the N1 to standard tones failed to show long-term habituation to stimulus repetition. were presented with series of auditory stimuli consisting of standard and deviant tones while watching a silent movie. Stimuli were 75 ms 1000 Hz and 1500 Hzsinusoidal tones with 5 ms rise and fall times. The inter-stimulus-interval was 1000 ms. The decrement in N1 response could be an ind…	PMID:22192499_2012_vanderMolen_Ramakers	Yes
FMR1	-	Homo sapiens	LoF	Fragile X Syndrome human participants	Electrodermal activity habituation	Electrodermal responses to repeated (different) sensory stimuli (olfactory, auditory, visual, tactile, and vestibular); habituation was not evaluated per stimulus type but across all stimuli	PMID:10208160_1999_Miller_Hagerman	Yes
FMR1	-	Homo sapiens	LoF	Individuals with fragile X	Event-related potential habituation	Comparison of the ERP waveforms for the first 45 stimuli to the last 45 stimuli	PMID:23981511_2013_Schneider_Hessl	Yes
FMR1	-	Homo sapiens	LoF	Individuals with fragile X	Event-related potential habituation	EEG was recorded in 14 FXS participants and 25 neurotypical controls during an auditory habituation paradigm using repeatedly presented pseudowords. Non-phased locked signal energy was compared across presentations and between groups using linear mixed models (LMMs) in order to investigate RS effects across repetitions and brain areas and a possible relation to non-verbal IQ (NVIQ) in FXS.	PMID:29378522_2018_Knoth_Lippe	Yes
FMR1	-	Homo sapiens	LoF	Individuals with FXTAS	Event-related potential habituation	Event-related potentials (ERPs) were obtained from a semantic judgment task in which semantically congruous (50%) and incongruous pairs repeat pseudorandomly	PMID:25111034_2014_Yang_Olichney	Yes
FMR1	-	Homo sapiens	LoF	Individuals with FXTAS	Acoustic habituation	Auditory oddbal paradigm	PMID:26898832_2016_Yang_Olichney	Yes
MAOA	-	Homo sapiens	LoF	MAOA linked polymorphisms connected to low activity of MAOA (LAM> deficit) or high activity of MAOA (HAM> not affected)	Mechanosensory event-related potential habituation	Noxious stimuation habituation to 1.5 fold of individual pain threshold consisting of 31 stimuli of the same intensity with an inter-stimulus interval ranging between 14 and 16 s.	PMID:24494688_2014_DiLorenzo_DiLorenzo	Yes
SYNGAP1	Syngap1	Homo sapiens	LoF	SYNGAP1 haploinsufficiency	Auditory habituation	For quantifying habituation in mice and humans, we calculated the ratio between the amplitudes of the first standard sound (S1) and the second (S2). These ratios were then converted to logarithmic based 10 scale.	PMID:34791091_2021_Carreno-Munoz_Di Cristo	Yes
ACHE	human transgene	Mus musculus	GoF	Overexpression of human ACHE-gene, especially increasing levels of synaptic isoform AChE-S. PMID: 15749986	Habituation to novel environment	Habituation to novelty over several days; as defined as ambulatory activity during 10-min daily sessions over six days. TgR (overexpress rare AChe variant that prevents its adherence to the membrane) not tested because failed to show exploratory behaviour at the beginning of the assay; instead ran frantically in circles around the center of the arena	PMID:17963737_2007_Kofman_Gabay	Yes
ARNTL	Arntl; Bmal1	Mus musculus	LoF	Bmal1-/- KO mice	Open field habituation	Habituation defined by the pattern of their exploratory behavior for 1 hour with 5-min resolution. In order to assess intersessional habituation, animals were exposed to the same environment 24 hours later. intrasessional + intersession habituation deficit	PMID:20519775_2010_Kondratova_Kondratov	Yes
ATP1A2	Atp1a2	Mus musculus	Unknown	examined knock-in mice in which the normally ouabainsensitive α2 isoform was made resistant (α2 R/R) while still retaining basal Na,K-ATPase enzymatic function.	Acoustic startle habituation	Animals received 50 identical trials of startle stimulus ( mixed frequency white noise burst of 120 dB SPL for 20 ms.) with an 8-s intertrial interval.	PMID:20936682_2011_Schaefer_Williams	Yes
ATP1A3	Atp1a3	Mus musculus	LoF	Myshkin mice have an amino acid change (I810N) in Na,K- ATPase 3 I810N results in a normally expressed, but inactive, 3 protein and a subsequent 42% reduction of total Na,K-ATPase activity in the mouse brain	Open field habituation	Habituation defined by horizontal activity in minutes over 4 days. No deficit in T-maze habituation observed; actually less exploration of a novel object was seen there.	PMID:26501181_2015_Kirshenbaum_Clapcote	Yes
BSG	Bsg	Mus musculus	LoF	knockout model by replacement of part of first excon with neomycin resistence gene	Habituation to novel environment	Habituation defined by locomotor activity in a 60 min session	PMID:9245724_1997_Naruhashi_Nabeshima	Yes
CASP3	Casp3	Mus musculus	LoF	Casp-/-	Open field habituation	Higher locomotion than WT; diminished habituation to objects: spent more time exploring familiar objects	PMID:25653368_2015_Lo_Sheng	Yes
CERS6	CerS6	Mus musculus	LoF	CerS6KO ->enzymatically inactive ceramide synthase 6	Open field habituation	3 trials; interstimulus time 2h (1st) and 24h (2nd); as defined by levels of locomotion, rearing activity, mean running speed, and the total duration of movement; CerS6KO mice exhibited significantly higher levels of agitation and exploratory activity in the open field than the wild type controls	PMID:23760501_2013_Ebel_Willecke	Yes
CHRM2	Chrm2	Mus musculus	LoF	M2[-/-] (male mice), null-mutation in the M2 muscarinic receptor gene (Chrm2)	Open field habituation	Between session; long term. Habituation definied as reduction in horizontal activity during the entire second exposure to the apparatus relative to the entire first exposure). 15min duration, 4h intersession interval. Within-session (60min) habituation was normal	PMID:18346798_2008_Bainbridge_Wrenn	Yes
CHRNA6	Chrna6	Mus musculus	GoF	α6 nAChR p.Leu280Ser; “hypersensitive” to endogenous ACh or exogenous nicotine	Habituation to novel environment	Habituation defined by locomotor activity for 30 minutes after placement into a novel environment	PMID:18940593_2009_Drenan_Lester	Yes
CKAP5	Ckap5	Mus musculus	LoF	Ckap5 (TOG protein) expression conditionally knocked out in hippocampal neurons (αCaMKII promoter, in postmitotic neurons, at early stages mainly hippocampus, at laet stages more general)	Open field habituation	Habituation defined as decrease in number of crossings and rearing btween two sessions (5min session, 24 in between)	PMID:23936366_2013_Barbarese_Carson	Yes
CLN8	Cln8	Mus musculus	LoF	1-bp frameship mutation in CLN8 gene leading to truncated CLN8 protein. Named as motor neuron degeneration (mnd) mouse.	Habituation to novel environment	Iinside activity monitor, over 3 days; defined as total distance, vertical movements, and activity change ratio (day 3 activity/(day 3 activity+day 1 activity)). 5min session per day. 4-5 month old mice, not 2-3 month old mice deficit	PMID:12020865_2002_Bolivar_Messer	Yes
CLOCK	Clock	Mus musculus	LoF	Clock/Clock LoF mutant mice	Open field habituation	Habituation defined by the pattern of their exploratory behavior of a novel environment for two consecutive days. Only intersession habituation impaired	PMID:20519775_2010_Kondratova_Kondratov	Yes
DGKI	Dgki	Mus musculus	LoF	DGKι−/− mice	Open field habituation		PMID:21119615_2011_Yang_Kim	Yes
DISC1	Disc1	Mus musculus	Unknown	DISC1 (L100P) Mice having heterozygous or homozygous mutation in exon 2 of mouse DISC1. Hyperdopaminergia and increase DA D2 receptor binding have been demonstrated in the DISC1 L110P mutant (lipina et al, 2010)	Open field habituation	Delay in habituation of HET & HOM mice versus WF for sniffing, total rearing, rearing to wall, rearing seated and stillness.	PMID:22388794_2012_Walsh_O'Tuathaigh	Yes
DRD1	Drd1	Mus musculus	LoF	D[1A] null mice in congenic C57BL/6 background	Habituation to novel environment	Habituation to clear glass observation cages (36×20×20 cm). Habituation of sniffing, locomotion, rearing seated, and rearing to wall in wild types over several hours was profoundly retarded in congenic D(1A) mutants; conversely, rearing free and sifting were essentially abolished.	PMID:12496944_2003_McNamara_Waddington	Yes
DRD1	Drd1	Mus musculus	LoF	D1 KO (constitutive gene deletion background mice)	Acoustic startle habituation	Habituation to acoustic startle (40-ms 120-dB pulse of broad-band white noise, 15 sec between trials)	PMID:18644244_2009_Halberstadt_Geyer	Yes
DTNBP1	Dtnbp1	Mus musculus	LoF	Sdy/Sdy mice (Sdy is a spontaneous mutation on chromosome 13 that arose in the DBA/2J strain. This mutation has been attributed to a deletion in the DTNBP-1 gene which abolishes expression of the dysbindin protein)	Habituation to novel environment	Habituation to novel environment (testing chambers) over several days - within-session habituation and in-between session habituation. Habituation as defined as spontaneous locomotor activity over 90 min. Days 1-4, then wait 72h and test again on day 7	PMID:18984010_2009_Bhardwaj_Srivastava	Yes
DTNBP1	Dtnbp1	Mus musculus	LoF	sdy/sdy mice, 38,129 nucleotide deletion in the Dtnbp1 gene	Open field habituation	Habituation defined by total distance travelled. two 5-min sessions, 35 min apart	PMID:19220483_2009_Cox_Arnold	Yes
EGR3	Egr3	Mus musculus	LoF	Egr3/ mice created from S129/SvJ embryonic stem cells injected into C57BL/6 pseudopregnant females, were back-crossed to C57BL/6 mice for 13 generations	Acoustic startle habituation	Acoustic startle response combined with PPI	PMID:17692471_2007_Mendel_Milbrandt	Yes
EPM2A	Epm2a	Mus musculus	LoF	Epm2a -/-	Acoustic startle habituation		PMID:12019206_2002_Ganesh_Yamakawa	Yes
ESR2	Esr2	Mus musculus	LoF	estrogen receptor-b disruption ER-b disruption was created by insertion of a neomycin resistance gene into exon 3 of the coding gene using homologous recombination in embryonic stem cells	Habituation to social stimulus	Habituation defined by total investigation time (s) of two social stimuli	PMID:17010099_2006_Choleris_Pfaff	Yes
FMR1	Fmr1	Mus musculus	LoF	Fmr1 KO mice	Acoustic event-related potential habituation	Fmr1 KO mice show a deficit in steady state habituation to sounds	PMID:26850918_2016_Lovelace_Razak	Yes
FMR1	Fmr1	Mus musculus	LoF	FMR1-KO; C57BL6 (backcrossed genetic background)	Habituation to novel object	Habituation to objects; number of contacts with five differently colored, textured, and shaped objects. Habituation deficit only in standard conditions, not enriched conditions	PMID:16076950_2005_Restivo_Ammassari-Teule	Yes
GJD2	Gjd2; Cx36	Mus musculus	LoF	deletion of coding region on exon 2; Cx36(-/-)	Habituation to novel environment	Habituation to more complex environment (Y-maze) over several days; as defined by number of entries; four sessions, 90 min, 1 day, and 4 days intersessional time; significantly more activity in day 3 and 4 vs controls. Open field habituation was not affected; deficit only in males.	PMID:15617784_2005_Frisch_Dere	Yes
GPR88	Gpr88	Mus musculus	LoF	CMV-Gpr88 total KO mutant	Open field habituation	Open field habituation over several days; as defined by total distance traveled during 30-min daily sessions over five days.	PMID:31346000_2019_Meirsman_Kieffer	Yes
GPR88	Gpr88	Mus musculus	LoF	D1R-Gpr88 conditional KO in D1R-medium spiny neurons mutant	Open field habituation	Open field habituation over several days; as defined by total distance traveled during 30-min daily sessions over five days.	PMID:31346000_2019_Meirsman_Kieffer	Yes
GRIA1	Gria1	Mus musculus	LoF	Gria1-/-	Open field habituation	Peak theta power remained elevated, other peaks decreased plus evidence for behavioural habituation deficit, rescued by GLUA1 expression	PMID:31000699_2019_Bygrave_Kätzel	Yes
GRIN1	Grin1	Mus musculus	LoF	Grin1 [neo/neo] knockdown mice; Incorporation of a neomysin resistance gene (neo) into intron 20 of the Grin1 locus, leading to an underexpression, but not elimination, of the Grin1 gene.	Open field habituation	Habituation defined by total distance traveled over 60 minutes	PMID:22571986_2013_Moy_Koller	Yes
GRM5	Grm5	Mus musculus	LoF	mGlu5 KO	Habituation to novel environment	Habituation to activity chamber over 60min. habituation assessed as the percent reduction in locomotor activity (distance travelled) from the first to the last 10-min time block. Excluded results from the drug treatment of C57BL/6J mice with the selective mGlu5-negative allosteric modulator MPEP	PMID:21153406_2011_Halberstadt_Powell	Yes
GTF2I	gtf2i	Mus musculus	LoF	heterozygous Gtf2i knock out	Habituation to novel object	Habituation defined as non siginificant difference in time spend exploring novel mouse from 5-10 seconds after exposure versus 1-5 seconds after exposure. (p=0.14)	PMID:21328569_2010_Sakurai_Buxbaum	Yes
HTT	human transgene	Mus musculus	GoF	Huntington's disease (HD) R6/1 transgenic mouse model, containing a human huntington gene exon-1 with approximately 115 CAG repeats	Habituation to novel environment	Habituation to activity chamber over 3 days. 5min/day on 3 consecutive days in a completely dark chamber. Habituation as activity change scores (comparing activity of 1st with activity of 3rd day), average movement length, speed, and stereotypic beam breaks. The mutation responsible for HD is an abnormal expansion of a CAG repeat in the HTT gene that encodes for huntingtin (HTT)”… “The mutation r…	PMID:15044061_2004_Bolivar_Messer	Yes
HTT	human transgene	Mus musculus	GoF	YAC128 mouse model of HD maintained on the FVB/N strain background. A YAC containing a full-length human huntingtin gene under the control of the endogenous human promoter was modified with a 128 glutamine [CAG] repeat expansion.	Acoustic startle habituation	The mutation responsible for HD is an abnormal expansion of a CAG repeat in the HTT gene that encodes for huntingtin (HTT)”… “The mutation responsible for HD leads to an abnormally long polyglutamine (polyQ) expansion in the huntingtin (Htt) protein, which confers one or more toxic functions to mutant Htt leading to neurodegeneration.”	PMID:15843620_2005_Raamsdonk_Hayden	Yes
IMMP2L	Immp2l	Mus musculus	LoF	homozygous (HOMO) Immp2l knockdown (Immp2l KD) mice with gene trap - only females habituation deficit	Acoustic startle habituation	Blocks of 120 dB startle pulses were presented at the beginning, the middle and the end of the PPI protocol, and were compared to determine the occurrence of startle habituation; defect only in HOMO females, increased intial startle response present in all females, incl. control .but included in the statistics, so the effect of startle block and sex is corrected for it.	PMID:31233820_2019_Kreilaus_Karl	Yes
KCNMA1	Kcnma1	Mus musculus	LoF	BKα+/− and BKα−/− through deletion of Kcnma1 gene	Acoustic startle habituation		PMID:24312024_2013_Typlt_Schmid	Yes
LARGE1	Large1	Mus musculus	LoF	homozygous (KO) LARGE[myd] mice. From Jackson laboratory The spontaneous autosomal recessive mutation myodystrophy (myd) is a deletion in exons 5-7 of the glycotransferase gene (Large) on chromosome 8; causing a frameshift and premature stop codon before the first two catalytic domains	Open field habituation	Habituation defined as decrease in the number of crossings and rearings between two sessions. 5min sessions, 24h in between. Paper PMID:23508358 from same author replicates these results	PMID:23508358_2013_Comim_Quevedo	Yes
LSAMP	Lsamp	Mus musculus	LoF	Lsamp-/- KO (To disrupt the Lsamp gene, we generated a targeting vector that replaced 69 nt of exon 2 including the 3’ splice site and 31 nt of intron 2 with a neo cassette inserted in the opposite transcription/translation frame relative to the Lsamp gene)	Habituation to novel environment	Habituation to activity chamber. habituation defined by total distance travelled. 30 min exploration time per day over 3 days and once 60 min. Acoustic startle did not measure habituation; both genders had higher locmotion activity in the first 10-min block. But females dropped to the level of control in the next two blocks. Only males habituation deficit.	PMID:18199495_2008_Catania_Levitt	Yes
NLGN3	Nlgn3	Mus musculus	LoF	Nlgn3 KO	Habituation to social stimulus		PMID:30093665_2018_Bariselli_Bellone	Yes
NR1D1	Nr1d1	Mus musculus	LoF	Rev-erbα (Nr1d1) KO mice	Open field habituation	Open field habituation over four consecutive days. habituation defined as beam breaks. 10 min exposure/day. Mice were individually placed in a clear 16 × 16 inches arena fitted with photocells to detect horizontal and rearing activities for 10 minutes	PMID:24552589_2014_Jager_Lazar	Yes
NRG1	Nrg1	Mus musculus	LoF	Nrg1[Tn] -> Nrg1 hypomorphic rats generated by gene trapping with the Sleeping Beauty transposon; transposon inserted into the first intron	Open field habituation	Open field habituation over two days; as defined by time mobile, line crossings, and total distance traveled during 10-min daily	PMID:21092742_2011_Taylor_Koenig	Yes
OMP	Omp	Mus musculus	LoF	All subjects were adult (8–9 months) females, and were genetargeted mice expressing the synaptopHluorin (spH) exocytosis indicator under control of the OMP promoter, replacing the OMP coding region as previously reported.	Olfactory habituation	Habituation defined by total investigation time during odor habituation trials (4x), where the filter paper was treated with hexaldehyde (HEX) all trials were 50 sec in duration and given at 5 min ITIs. The experimenter manually scored investigation time (in sec) in the ‘‘odor zone’’.	PMID:23630588_2013_Kass_McGann	Yes
OTX2	Otx2	Mus musculus	GoF	Mouse mutants expressing Otx2 under the endogenous promoter of En1, active in a strip on either side of the mid–hindbrain junction, ectopically express Otx2 in the hindbrain (En1+/Otx2). These changes result in an increase in the number of specified DA neurons and a complementary reduction in the number of specified 5-HT neurons.	Open field habituation	Intra-session locomotor activity decline	PMID:25241801_2015_Jukic_Brodski	Yes
PLAT	Plat	Mus musculus	LoF	t-PA (synonym for Plat) knockout mice	Habituation to novel object		PMID:11682111_2001_Ammassari-Teule_Passino	Yes
PLAT	Plat	Mus musculus	LoF	t-PA (synonym for Plat) knockout mice from Jackson Laboratory	Habituation to novel object	Object exploration habituation; as defined by number of contacts with novel object. The observed deficit for t-PA-KO mice was accompanied with a low number of contact on the first trial of novel object. While WT mice showed a large intial response, and a decrease over time. Showed the t-PA mice a smaller (equal to second trial of WT) inital respons that persisted troughout the three testing momen…	PMID:10762331_2000_Calabresi_Gulino	Yes
PPARGC1A	Ppargc1a	Mus musculus	LoF	Pgc-1α (Ppargc1a) conditional knockout in GABAergic neurons	Habituation to novel object	Object exploration habituation; as defined by difference of time spent in exploring the familiar and in exploring the novel object during the test phase	PMID:32057952_2020_Wang_Zhang	Yes
PRKN	Prkn	Mus musculus	LoF	pa-/-(F4) KO; knockout mouse with an exon 3 deletion in the parkin gene backcrossed with wild-type C57BL⁄6J for three generations	Habituation to novel environment	Locomotor activity on day 1 verus 2 and 3. Did not show wildtype expected decease in distance crossed.	PMID:17883413_2007_Zhu_Lübbert	Yes
PRKN	Prkn	Mus musculus	LoF	parkin−/−, gene deletion on exon 3	Open field habituation	Mice were placed into the center of the square arena (50 cm wide ×50 cm deep ×40 cm high) made of grey PVC for 60 min on two consecutive days. The distance traveled (m) was collected in 5-min intervals. On day two parkin-/- showed habituation deficit	PMID:25486126_2014_Rial_Prediger	Yes
PTPRA	Ptpra	Mus musculus	LoF	Ptpra KO mice (RPTPalpha-deficient)	Acoustic startle habituation	Aged animals; 5 months old. Effect not visible at 2.5 months old; here control lacks habituation causing effect of mutant not to be significant.	PMID:21831360_2011_Takahashi _Sap	Yes
PTPRR	ptprr	Mus musculus	LoF	ptprr knockout mice	Open field habituation	Odor habituation not affected. PTPRR, one of the three KIM-containing PTPs, is specifically enriched in the brain and targets the p38, JNK and preferably ERK1/2/5 MAPKs.	PMID:24556203_2014_Erkens_Zee	Yes
RAG1	Rag1	Mus musculus	LoF	Rag-1 KO, B6.129S7-Rag1[−/−tm1Mom] mice	Open field habituation	Habituation defined by total movements over 60 minutes. Significant difference open field only under bright light, not dim lighting conditions	PMID:12522033_2003_Cushman_Petitto	Yes
S-100β (S100B)	S100b	Mus musculus	GoF	S-100β transgenic CD-1 mice - overexpression	Open field habituation	Habituation over 5 minutes. Habituation defined as beam crossings. Also deficits in time spend in novel arm, and gnawing on novel objects.	PMID:12888777_2003_Bell_Whitaker-Azmitia	Yes
S-100β (S100B)	S100b	Mus musculus	GoF	S-100β transgenic CD-1 mice - overexpression (Transgenic mice from lines SI00,-2, SI00-8, Sl00-4and SI00-5 carrying approximately 110, 70, ten and eight copies of the transgene)	Open field habituation	Habituation to large open field over 9 minutes. Locomotion score based on grid template. The recording session lasted for 9 min and was divided into three equal intervals	PMID:7703219_1995_Gerlai_Roder	Yes
SHANK3	Shank3	Mus musculus	LoF	VTA-shShank3	Habituation to social stimulus	Habituation defined by interaction with same social stimulus	PMID:30364266_2018_Bariselli_Bellone	Yes
SLC6A3	Slc6a3	Mus musculus	LoF	Slc6a3 (DAT) knockout	Open field habituation	Habituation defined by decreased locomotor activity (when compared to locomotion in the first minute in the apparatus)	PMID:23417514_2013_Fox_Murphy	Yes
SNCA	human transgene	Mus musculus	GoF	Transgenic mice overexpressing human WT α-synuclein under the "neuron/brain-speicifc" Thy-1 promoter (Thy1-aSyn)	Open field habituation	Locomotion decline in 15-min session and locomotion difference between 3 5-min blocks	PMID:214488084_2011_Lam_Maidment	Yes
SNCA	human transgene	Mus musculus	GoF	Transgenic mice overexpressing human WT α-synuclein under the "neuron/brain-speicifc" Thy-1 promoter (Thy1-aSyn)	Open field habituation	Locomotion decline in 15-min session and locomotion difference between 3 5-min blocks. Repeated previously published deficit in open-field habituation (Lam 2011)	PMID:25505609_2014_Magen_Chesselet	Yes
SRF	Srf	Mus musculus	LoF	Srf[D1Cre] -> constitutive SRF ablation in dopaminoceptive neurons (that express D1 dopamine receptor)	Habituation to novel environment	Habituation defined by horizontal locomotor activity over time in an unfamiliar activity chamber	PMID:20223941_2010_Parkitna_Schütz	Yes
STAT6	Stat6	Mus musculus	LoF	STAT-6 deficient mice	Open field habituation	Significantly more hyperactive in the final two blocks of an open field test, indicating abnormal habituation in completing the task	PMID:15806304_2005_Yukawa_Maeda	Yes
Syngap1	Syngap1	Mus musculus	LoF	Syngap1+/− carrying a deletion of exons 8-10 of the Syngap1 gene, which encode for the C2 and GAP domains. They were maintained as a heterozygous line onto a C57Bl/6 background	Auditory habituation	For quantifying habituation in mice and humans, we calculated the ratio between the amplitudes of the first standard sound (S1) and the second (S2). These ratios were then converted to logarithmic based 10 scale.	PMID:34791091_2021_Carreno-Munoz_Di Cristo	Yes
TNC	Tnc	Mus musculus	LoF	tenacin-gene KO mice in which the second exon of the tenascin-gene is replaced with the lacZ gene, were generated in 1992.	Habituation to novel environment	Habituation to novel environment as defined by activity score over 60 minutes	PMID:9407997_1997_Fukamauchi_Kusakabe	Yes
TPH2	Tph2	Mus musculus	LoF	Tph2−/− mice	Habituation to novel environment	Novelty space habituation 60 min. The area of the cage was virtually subdivided in squares and the times the testing mouse crossed one of the grid lines with all four paws (i.e. square entry) was scored, as well as the times it stood on its hind legs (i.e. vertical activity, also known as rearing).	PMID:30087403_2018_Maddaloni_Pasqualetti	Yes
UNC5C	Unc5c	Mus musculus	LoF	Spacially defined LoF of Unc5h3 gene. The phenotype of this mutant mouse may be attributable to the transgene insertion and concomitant deletion in intron 1 of the Unc5h3 gene. Although expressions of the Unc5h3 gene were comparable between wildtype and tg/+ mice in most tissues, they were significantly reduced or undetectable in the cerebellum, lung, spleen and ovary of tg/tg mice. Interestingly…	Open field habituation	Habituation to open space. As defined by locomotion during 2h of observation. Both tg/+ and wildtype mice exhibited normal locomotor habituation over time. However, tg/tg mice did not show the usual pattern of habituation.	PMID:14562603_2003_Choi_Lee	Yes
CNTNAP2	Cntnap2	Rattus norvegicus	LoF	Cntnap2 knock-out model	Acoustic startle habituation	Habituation defined by the difference of average startle magnitude during trial 7 & 8 verus trail 1. Thirty startle stimuli (20 ms white noise at 105 dB SPL; 5ms rise/fall time) were presented with a randomly varying intertrial interval (ITI: 12, 15, or 18 s) during a continuous background noise (60 dB SPL white noise). Effect only visible during adolescence P38	PMID:30126973_2018_Scott_Schmid	Yes
DAB1	Dab1	Rattus norvegicus	LoF	Dab1 shRNA	Habituation to novel object	Object recognition habituation as defined by the total distance moved (cm) on sample day versus test day. Some difficulty to replicate the results; not found a difference in initial open-field habituation. only when going to object recognition task.	PMID:26965907_2017_Vormund_Korth	Yes
GRIN1	Grin1	Rattus norvegicus	LoF	LoF of N-methyl-D-aspartate receptor subunit NR1 protein by injection of NR1 antisense expressing plasmids	Open field habituation		PMID:12884967_2003_Adrover_Jerusalinsky	Yes
TSC1	Tsc1	Rattus norvegicus	LoF	Knockdown of TSC1 via bilateral injection with rat Tsc1 shRNA inducing ischemia	Open field habituation	Significant effect of injection, with significant additive effect of TSC1 knockdown. "Ischemia results in loss of habituation manifested by increased locomotor activity, which is consistent with the extent of neuronal loss in the pyramidal layer of the hippocampus20. Rats injected with either TSC1 shRNA or control shRNA bilaterally in the CA3 region showed a significant increase in locomotor acti…	PMID:23435171_2013_Papadakis_Buchan	Yes
Gene not recognised by DIOPT	hab-1	Caenorhabiditis elegans	Unknown	hab-1(cn308) mutant, nature unknown, gene mapped but further not described	Mechanosensory habituation	Abnormal distance response to repeated tap stimuli or head-touch stimuli	PMID:12420788_2002_Xu_Hosono	No
Gene not recognised by DIOPT	hab-2	Caenorhabiditis elegans	Unknown	hab-2(cn312) mutant, nature unknown, gene not mapped	Mechanosensory habituation	Abnormal distance response to repeated tap stimuli or head-touch stimuli	PMID:12420788_2002_Xu_Hosono	No
Gene not recognised by DIOPT	hab-3	Caenorhabiditis elegans	Unknown	hab-3(cn350) mutant	Mechanosensory habituation	Abnormal distance response to repeated tap stimuli or head-touch stimuli	PMID:12420788_2002_Xu_Hosono	No
Human ortholog score < 3	Iron-8	Caenorhabiditis elegans	Predicted LoF	tm8188 deletion mutant; 93 bp deletion	Mechanosensory habituation	30 mechanosensory stimuli at a 10 second interstimulus interval (ISI) after measuring baseline locomotion for 5 min. Habituation defined as reduced response probability	PMID:31754030_2020_McDiarmid_Rankin	No
Human ortholog score < 3	M03D4.4	Caenorhabiditis elegans	Predicted LoF	tm10242 deletion mutant; 130 bp deletion	Mechanosensory habituation	30 mechanosensory stimuli at a 10 second interstimulus interval (ISI) after measuring baseline locomotion for 5 min. Habituation defined as reduced response probability. Additionally a reduced initial response speed (1/2 strains) was observed.	PMID:31754030_2020_McDiarmid_Rankin	No
Human ortholog score < 3	M03D4.4	Caenorhabiditis elegans	Predicted LoF	tm559 deletion mutant; 618 bp deletion	Mechanosensory habituation	30 mechanosensory stimuli at a 10 second interstimulus interval (ISI) after measuring baseline locomotion for 5 min. Habituation defined as reduced response probability. Additionally a reduced initial response speed (1/2 strains) was observed.	PMID:31754030_2020_McDiarmid_Rankin	No
Human ortholog score < 3	mps-1	Caenorhabiditis elegans	LoF	Pmps-1∷d178n–mps-1 worms; transgenic worms bearing a inactivated kinase variant (D178N) of MPS-1	Mechanosensory habituation	Tap habituation to repetitive mechanical stimulation; 2 s, 10 s and 60 ISI. Also tested kht-1 null mutants but they were non-performers	PMID:19387491_2009_Cai_Sesti	No
Human ortholog score < 3	npax-2	Caenorhabiditis elegans	LoF	tm2107 mutant, knockout, 745 bp deletion	Mechanosensory habituation	30 mechanosensory stimuli at a 10 second interstimulus interval (ISI) after measuring baseline locomotion for 5 min. Habituation defined as reduced response probability.	PMID:31754030_2020_McDiarmid_Rankin	No
Human ortholog score < 3	ztf-6	Caenorhabiditis elegans	Predicted LoF	tm1803 deletion mutant; 1442 bp deletion	Mechanosensory habituation	30 mechanosensory stimuli at a 10 second interstimulus interval (ISI) after measuring baseline locomotion for 5 min. Habituation defined as reduced response probability. Additionally a reduced initial response probability was observed. Another strain: habituation not affected for that worm gene	PMID:31754030_2020_McDiarmid_Rankin	No
Gene not recognised by DIOPT	chrm4b	Danio rerio	Predicted LoF	CRISPR induced truncating mutation: a249	Mechanosensory habituation	Tap Habituation	PMID:30929901_2019_Thyme_Schier	No
Gene not recognised by DIOPT	irbl	Danio rerio	Unknown	muant p173 type mutation unknown	Acoustic habituation	Gene locus not yet identified at time of publication	PMID:25754827_2015_Wolman_Granato	No
Gene not recognised by DIOPT	uinh	Danio rerio	Unknown	mutant p175 type mutation unknown	Acoustic habituation	Gene locus not yet identified at time of publication	PMID:25754827_2015_Wolman_Granato	No
Gene not recognised by DIOPT	grhd	Danio rerio	Unknown	mutant p176 type mutation unknown	Acoustic habituation	Gene locus not yet identified at time of publication	PMID:25754827_2015_Wolman_Granato	No
Gene not recognised by DIOPT	dory	Danio rerio	Unknown	mutant p177 type mutation unknown	Acoustic habituation	Gene locus not yet identified at time of publication	PMID:25754827_2015_Wolman_Granato	No
Gene not recognised by DIOPT	divat	Danio rerio	Unknown	mutant p178 type mutation unknown	Acoustic habituation	Gene locus not yet identified at time of publication	PMID:25754827_2015_Wolman_Granato	No
Gene not recognised by DIOPT	oidia	Danio rerio	Unknown	mutant p179 type mutation unknown	Acoustic habituation	Gene locus not yet identified at time of publication	PMID:25754827_2015_Wolman_Granato	No
Gene not recognised by DIOPT	rof	Danio rerio	Unknown	mutant p180 type mutation unknown	Acoustic habituation	Gene locus not yet identified at time of publication	PMID:25754827_2015_Wolman_Granato	No
Gene not recognised by DIOPT	fgt	Danio rerio	Unknown	mutant p182/p182 unknown effect (forward screen)	Acoustic habituation	Gene locus not yet identified at time of publication	PMID:25754827_2015_Wolman_Granato	No
Human ortholog score < 3	satb1b	Danio rerio	Predicted LoF	CRISPR induced truncating mutation: a322	Mechanosensory habituation	Excluded; very low orthology score. Satb1a included	PMID:30929901_2019_Thyme_Schier	No
Human ortholog score < 3	nob	Drosophila melanogaster	Unknown	no-bridge [KS49] (nob) mutant	Gustatory habituation	Habituation of the proboscis extension reflex. Habituation defined as a decrease in mean number of suppressions of the mutant versus the control	PMID:8126596_1993_Bouhouche_Corbière	No
Human ortholog score < 3	tur	Drosophila melanogaster	Unknown	turnip [ps274] mutant	Gustatory habituation	Habituation of the proboscis extension reflex. Habituation was tested using 10-min intervals between the initial test, habituating stimulus, and final test. Flies were tested in groups of 10-16 and each stimulus was applied to all the flies in order. Each fly was used for only one habituation sequence.	PMID:6808513_1982_Duerr_Quinn	No

## Sheet: Table_S2_GOComponents
	GeneOntology accession	ReferenceList N = 20595	InputList N = 411	InputList Fold Enrichment	InputList raw P-value	InputList FDR	Genelist
Regulation of transcription						N = 91	ACVR1	ACVRL1	ADCY1	AP3B1	APP	ARID1A	ARID1B	ARNTL	ARX	ATF1	ATRX	CAMK1	CAMK1D	CAMTA1	CAMTA2	CASK	CLOCK	CREB1	CREM	CTNNB1	DAB2IP	DLG1	EGR3	EHMT1	EHMT2	ESR2	FOXP1	FOXP2	FOXP4	GATAD2A	GATAD2B	GLI1	GLI2	GLI3	GRIN1	GSK3A	GTF2I	HRAS	IHH	IRX1	IRX2	IRX3	IRX4
regulation of transcription by RNA polymerase II	GO:0006357	2586	82	1.59	2.56e-05	0.000776	ACVR1	ACVRL1	AP3B1	APP	ARID1A	ARID1B	ARNTL	ARX	ATF1	ATRX	CAMK1	CAMTA1	CAMTA2	CASK	CLOCK	CREB1	CREM	CTNNB1	DAB2IP	DLG1	EGR3	EHMT1	EHMT2	ESR2	FOXP1	FOXP2	FOXP4	GATAD2A	GATAD2B	GLI1	GLI2	GLI3	GRIN1	GSK3A	GTF2I	HRAS	IHH	IRX1	IRX2	IRX3	IRX4	IRX5	IRX6
negative regulation of transcription, DNA-templated	GO:0045892	1288	50	1.95	1.35e-05	0.000446	APP	ARNTL	ARX	ATRX	CLOCK	CREB1	CREM	CTNNB1	DAB2IP	DLG1	EHMT1	EHMT2	ESR2	FOXP1	FOXP2	FOXP4	GATAD2A	GATAD2B	GLI2	GLI3	IRX1	IRX2	KDM5B	KDM5C	KMT2D	LEF1	MCPH1	NCOR1	NCOR2	NR1D1	NR3C1	NRG1	NSD1	NSD2	PAX2	PRKN	SATB1	SHH	SNCA	SRF	STAT6	TCF3	TCF7
positive regulation of DNA-binding transcription factor activity	GO:0051091	270	14	2.6	0.0015	0.0246	ADCY1	APP	CAMK1D	CLOCK	CTNNB1	ESR2	KRAS	PPARGC1A	PRKD1	PRKD2	PTEN	SHH	SRF	TCF3
positive regulation of transcription by RNA polymerase II	GO:0045944	1206	49	2.04	4.22e-06	0.000161	ACVR1	ACVRL1	AP3B1	APP	ARNTL	ATF1	ATRX	CAMK1	CAMTA2	CASK	CLOCK	CREB1	CTNNB1	DAB2IP	EGR3	ESR2	GLI1	GLI2	GLI3	GRIN1	GSK3A	GTF2I	HRAS	IHH	IRX6	KDM6B	KMT2C	KMT2D	LEF1	NR1D1	NR3C1	OGT	OTX2	PAX2	PAX8	POGZ	PPARGC1A	PRKD1	PRKD2	PRKN	RAF1	SHH	SRF
negative regulation of transcription by RNA polymerase II	GO:0000122	902	37	2.06	5.37e-05	0.00149	APP	ARX	ATRX	CREM	CTNNB1	DAB2IP	DLG1	EHMT1	EHMT2	ESR2	FOXP1	FOXP2	FOXP4	GATAD2A	GATAD2B	GLI2	GLI3	IRX1	IRX2	LEF1	MCPH1	NCOR1	NCOR2	NR1D1	NR3C1	NSD1	NSD2	PRKN	SATB1	SHH	SNCA	SRF	STAT6	TCF3	TCF7L2	ZEB1	ZEB2
positive regulation of CREB transcription factor activity	GO:0032793	20	4	10.02	0.00113	0.0193	ADCY1	CAMK1D	PRKD1	PRKD2
Cation transport						N = 65	SLC25A2	SLC6A3	ATP7A	EPM2A	SLC32A1	CACNA2D3	CACNA2D2	KCNAB1	CACNA2D4	KCNAB3	ZDHHC17	SLC25A15	KCNU1	KCNQ2	KCNQ4	KCNQ5	KCNA10	IREB2	KCNA3	KCNA4	KCNA6	CLCN3	KCNA7	SLC17A6	SLC17A7	SLC17A8	COX10	ACHE	KCNK9	ATP7B	CACNA2D1	KCNK15	CASK	TSC1	KCNAB2	CACNB2	KCNMA1	KCNQ3	HCN4	PRKN	HCN3	GPM6A	KCNA1
Cation transport	GO:0006812	826	65	3.94	2.9e-20	9.73e-18	SLC25A2	SLC6A3	ATP7A	EPM2A	SLC32A1	CACNA2D3	CACNA2D2	KCNAB1	CACNA2D4	KCNAB3	ZDHHC17	SLC25A15	KCNU1	KCNQ2	KCNQ4	KCNQ5	KCNA10	IREB2	KCNA3	KCNA4	KCNA6	CLCN3	KCNA7	SLC17A6	SLC17A7	SLC17A8	COX10	ACHE	KCNK9	ATP7B	CACNA2D1	KCNK15	CASK	TSC1	KCNAB2	CACNB2	KCNMA1	KCNQ3	HCN4	PRKN	HCN3	GPM6A	KCNA1
Metabolic process						N = 35	PRPS2	PRPS1	GALT	DPYS	ADK	IHH	ADCY1	PIGV	GK2	PDE4B	GPC3	PDE4A	GPC5	ASL	LARGE1	ATP7A	PRPS1L1	MANBA	TPI1	COG7	FKRP	ALG9	GK	PDE4D	MAGI3	PDE4C	SLC35C1	OGA	CASK	ALG1	UPB1	DLG1	DLG2	DPYD	OGT
carbohydrate derivative metabolic process	GO:1901135	1006	35	1.74	0.00179	0.0286	PRPS2	PRPS1	GALT	DPYS	ADK	IHH	ADCY1	PIGV	GK2	PDE4B	GPC3	PDE4A	GPC5	ASL	LARGE1	ATP7A	PRPS1L1	MANBA	TPI1	COG7	FKRP	ALG9	GK	PDE4D	MAGI3	PDE4C	SLC35C1	OGA	CASK	ALG1	UPB1	DLG1	DLG2	DPYD	OGT
MAPK cascade						N = 47	APP	ARAF	ARHGEF6	BRAF	BRAF	CTNNB1	DAB2IP	DLG1	DLG2	DLG3	DLG4	GLIPR2	GRIK2	GRIN1	GRIN2B	HRAS	KRAS	MAGI1	MAGI3	MAP2K1	MAP2K2	MAPK8IP3	NCOR1	NF1	NRAS	NRG1	NRXN1	PAK1	PAK3	PRKD2	PRKN	PTEN	PTPN11	PTPN6	PTPRA	PTPRR	RAF1	RASAL2	SHANK3	SOS1	SPAG9	SPRED1	SPRED2
regulation of MAPK cascade	GO:0043408	694	34	2.45	3.29e-06	0.000129	APP	BRAF	CTNNB1	DAB2IP	DLG1	GLIPR2	GRIK2	HRAS	KRAS	MAGI1	MAGI3	MAP2K1	MAP2K2	MAPK8IP3	NCOR1	NF1	NRG1	NRXN1	PAK1	PAK3	PRKD2	PRKN	PTEN	PTPN11	PTPN6	PTPRR	SPAG9	SPRED1	SPRED2	SPRED3	SYNGAP1	ZDHHC17	ZMYND11
MAPK cascade	GO:0000165	409	28	3.43	4.51e-08	2.99e-06	ARAF	ARHGEF6	BRAF	DAB2IP	DLG1	DLG2	DLG3	DLG4	GRIN1	GRIN2B	HRAS	KRAS	MAP2K1	MAP2K2	MAPK8IP3	NF1	NRAS	NRG1	PAK1	PAK3	PTPRA	RAF1	RASAL2	SHANK3	SOS1	SPAG9	SPRED1	SYNGAP1
regulation of ERK1 and ERK2 cascade	GO:0070372	291	18	3.1	4.2e-05	0.00119	APP	BRAF	DAB2IP	DLG1	GLIPR2	HRAS	MAGI1	MAP2K1	NRXN1	PRKD2	PTEN	PTPN11	PTPN6	PTPRR	SPRED1	SPRED2	SPRED3	ZDHHC17
negative regulation of MAPK cascade	GO:0043409	169	13	3.85	6.41e-05	0.00174	DAB2IP	DLG1	MAGI1	NCOR1	NF1	PRKN	PTEN	PTPN6	PTPRR	SPRED1	SPRED2	SPRED3	ZMYND11
negative regulation of ERK1 and ERK2 cascade	GO:0070373	72	8	5.57	0.00017	0.00406	DAB2IP	DLG1	MAGI1	PTEN	PTPRR	SPRED1	SPRED2	SPRED3
Chemical synaptic transmission						N = 92	ACHE	ADCY1	AKAP9	APP	ATP1A2	BDNF	BRAF	CACNA1A	CACNA1B	CACNA1E	CACNA1G	CACNB2	CAMK1	CASK	CELF4	CEP89	CHRM2	CHRM4	CHRNA6	CLCN3	CNTNAP4	CREB1	CTNNB1	DGKI	DISC1	DLG1	DLG2	DLG4	DMPK	DRD1	DTNBP1	EGR3	ELAVL4	FMR1	GABRB1	GABRB2	GABRB3	GAD1	GAD2	GRIA1	GRIA2	GRIA3	GRIA4
chemical synaptic transmission	GO:0007268	420	68	8.11	4.09e-38	3.23e-34	ACHE	AKAP9	CACNA1A	CACNA1B	CACNA1E	CACNA1G	CACNB2	CAMK1	CASK	CEP89	CHRM2	CHRM4	CHRNA6	CLCN3	CTNNB1	DGKI	DLG1	DLG2	DLG4	DRD1	EGR3	GABRB1	GABRB2	GABRB3	GAD1	GAD2	GRIA1	GRIA2	GRIA3	GRIA4	GRIK1	GRIK2	GRIK3	GRIN1	GRIN2A	GRIN2B	GRIN2C	GRIN2D	GRM5	GSK3A	GSK3B	KCNA1	KCNK3
modulation of chemical synaptic transmission	GO:0050804	424	56	6.62	2.39e-27	1.79e-24	APP	GSK3B	ACHE	FMR1	ZMYND8	ELAVL4	GRIK3	CELF4	PTEN	GRIK1	GRIK2	PPP1R9A	PPP1R9B	GRM5	SYNGAP1	HRAS	CASK	SYN3	SHISA9	SYN1	CACNB2	CREB1	AKAP9	SHANK3	SHANK2	DGKI	SHANK1	CNTNAP4	NLGN3	GRIA1	PRKN	LAMA2	STXBP1	SRF	NRXN1	CACNA1B	HTT	CACNA1A	ATP1A2	ADCY1	GRIN2A	DRD1	DISC1
negative regulation of synaptic transmission	GO:0050805	61	15	12.32	1.75e-11	2.36e-09	GRIA1	PRKN	ACHE	FMR1	STXBP1	SRF	GRIK3	CELF4	PTEN	HTT	BRAF	GRIK2	PPP1R9A	SHANK3	SHANK2
synaptic transmission, dopaminergic	GO:0001963	14	4	14.32	0.000356	0.00777	PRKN	DRD1	SLC6A3	SNCA
dopamine uptake involved in synaptic transmission	GO:0051583	5	3	30.07	0.000387	0.00822	PRKN	SLC6A3	SNCA
regulation of spontaneous synaptic transmission	GO:0150003	7	3	21.48	0.000806	0.0148	PRKN	APP	PPP1R9A
catecholamine uptake involved in synaptic transmission	GO:0051934	5	3	30.07	0.000387	0.00825	PRKN	SLC6A3	SNCA
Chromatin organisation						N = 43	APP	ARID1A	ARID1B	ATRX	CLOCK	CTNNB1	EHMT1	EHMT2	EP400	FMR1	GATAD2B	KDM5A	KDM5B	KDM5C	KDM5D	KDM6A	KDM6B	KMT2C	KMT2D	KMT5B	KMT5C	LEF1	NCOR1	NR3C1	NSD1	NSD2	NSD3	OGT	PAK1	PPARGC1A	PRKD1	PRKD2	RAG1	SATB1	SETD2	SNCA	SRCAP	TCF3	TCF7L1	UBE2A	UBE2B	WAC	ZMYND11
chromatin organization	GO:0006325	697	36	2.59	4.43e-07	2.27e-05	ARID1A	ARID1B	ATRX	CLOCK	EHMT1	EHMT2	EP400	GATAD2B	KDM5A	KDM5B	KDM5C	KDM5D	KDM6A	KDM6B	KMT2C	KMT2D	KMT5B	KMT5C	LEF1	NCOR1	NR3C1	NSD1	NSD2	NSD3	OGT	PAK1	RAG1	SATB1	SETD2	SRCAP	TCF3	TCF7L1	UBE2A	UBE2B	WAC	ZMYND11
regulation of chromatin organization	GO:1902275	203	14	3.46	0.000102	0.0026	APP	ATRX	CTNNB1	EHMT2	FMR1	KDM5A	NSD1	NSD3	OGT	PPARGC1A	PRKD1	PRKD2	SNCA	UBE2B
histone modification	GO:0016570	356	26	3.66	4.17e-08	2.8e-06	CLOCK	EHMT1	EHMT2	EP400	KDM5A	KDM5B	KDM5C	KDM5D	KDM6A	KDM6B	KMT2C	KMT2D	KMT5B	KMT5C	LEF1	NSD1	NSD2	NSD3	OGT	PAK1	RAG1	SETD2	SRCAP	UBE2A	UBE2B	WAC
regulation of histone modification	GO:0031056	148	14	4.74	3.86e-06	0.000148	APP	ATRX	CTNNB1	EHMT2	FMR1	KDM5A	NSD1	NSD3	OGT	PPARGC1A	PRKD1	PRKD2	SNCA	UBE2B
chromatin remodeling	GO:0006338	172	13	3.79	7.58e-05	0.00201	ARID1A	ARID1B	ATRX	GATAD2B	KDM5A	KDM5B	KDM5C	KDM5D	KDM6A	KDM6B	PAK1	SATB1	SRCAP
histone lysine methylation	GO:0034968	68	12	8.84	4.87e-08	3.16e-06	EHMT1	EHMT2	KDM6A	KMT2C	KMT2D	KMT5B	KMT5C	NSD1	NSD2	NSD3	OGT	SETD2
histone methylation	GO:0016571	86	12	6.99	4.78e-07	2.42e-05	EHMT1	EHMT2	KDM6A	KMT2C	KMT2D	KMT5B	KMT5C	NSD1	NSD2	NSD3	OGT	SETD2
histone lysine demethylation	GO:0070076	30	7	11.69	6.47e-06	0.00023	KDM5A	KDM5B	KDM5C	KDM5D	KDM6A	KDM6B	UBE2B
histone demethylation	GO:0016577	32	7	10.96	9.34e-06	0.00032	KDM5A	KDM5B	KDM5C	KDM5D	KDM6A	KDM6B	UBE2B
histone H3-K4 demethylation, trimethyl-H3-K4-specific	GO:0034721	5	4	40.09	1.68e-05	0.000535	KDM5A	KDM5B	KDM5C	KDM5D
histone H3-K4 demethylation	GO:0034720	9	4	22.27	8.98e-05	0.00231	KDM5A	KDM5B	KDM5C	KDM5D
histone H4-K20 methylation	GO:0035574	8	4	25.05	6.31e-05	0.00171	KMT5B	KMT5C	NSD1	NSD2
regulation of histone deacetylase activity	GO:1901725	9	3	16.7	0.00143	0.0238	KDM5A	PRKD1	PRKD2
Gliogenesis						N = 22	APP	CNTNAP1	CTNNB1	DAB1	DAB2IP	DISC1	EPM2A	ERCC2	GLI3	KRAS	LAMA2	LAMC3	LEF1	MAP2K1	NF1	NRG1	PAX2	PHGDH	PTEN	PTPN11	SHH	SYNE2
gliogenesis	GO:0042063	222	22	4.97	3.1e-09	2.82e-07	APP	CNTNAP1	CTNNB1	DAB1	DAB2IP	DISC1	EPM2A	ERCC2	GLI3	KRAS	LAMA2	LAMC3	LEF1	MAP2K1	NF1	NRG1	PAX2	PHGDH	PTEN	PTPN11	SHH	SYNE2
glial cell differentiation	GO:0010001	171	17	4.98	1.87e-07	1.05e-05	APP	CNTNAP1	MAP2K1	LAMA2	LAMC3	LEF1	PTEN	PTPN11	NRG1	PAX2	GLI3	SHH	ERCC2	NF1	CTNNB1	KRAS	PHGDH
glial cell development	GO:0021782	112	10	4.47	0.000145	0.00353	APP	CNTNAP1	SHH	LAMC3	ERCC2	NF1	PTEN	KRAS	NRG1	PHGDH
astrocyte differentiation	GO:0048708	52	7	6.75	0.000148	0.00361	APP	SHH	MAP2K1	LAMC3	NF1	KRAS	PTPN11
forebrain astrocyte differentiation	GO:0021896	2	2	50.11	0.00223	0.0333	NF1	KRAS
Learning or memory						N = 38	ADCY1	APP	ATP1A2	BDNF	BRAF	CASP3	CLN8	CNTNAP2	CREB1	DGKI	DLG4	DRD1	EHMT2	ELAVL4	EPM2A	GPR88	GRIA1	GRIN1	GRIN2A	GRIN2B	GRM5	HTT	KRAS	NF1	NLGN3	NRXN1	NRXN2	NRXN3	PPP1R9B	PRKN	PTEN	RAG1	S100B	SHANK1	SHANK2	SHANK3	SRF	SYNGAP1
learning or memory	GO:0007611	252	39	7.76	1.91e-21	9.13e-19	ADCY1	APP	ATP1A2	BDNF	BRAF	CASP3	CLN8	CNTNAP2	CREB1	DGKI	DLG4	DRD1	EHMT2	ELAVL4	EPM2A	GPR88	GRIA1	GRIN1	GRIN2A	GRIN2B	GRM5	HTT	KRAS	NF1	NLGN3	NRXN1	NRXN2	NRXN3	PPP1R9B	PRKN	PTEN	RAG1	S100B	SHANK1	SHANK2	SHANK3	SRF	SYNGAP1
cognition	GO:0050890	294	39	6.65	2.49e-19	7.13e-17	ADCY1	APP	ATP1A2	BDNF	BRAF	CASP3	CLN8	CNTNAP2	CREB1	DGKI	DLG4	DRD1	EHMT2	ELAVL4	EPM2A	GPR88	GRIA1	GRIN1	GRIN2A	GRIN2B	GRM5	HTT	KRAS	NF1	NLGN3	NRXN1	NRXN2	NRXN3	PPP1R9B	PRKN	PTEN	RAG1	S100B	SHANK1	SHANK2	SHANK3	SRF	SYNGAP1
learning	GO:0007612	142	30	10.59	4.59e-20	1.51e-17	APP	ATP1A2	BRAF	CLN8	CNTNAP2	CREB1	DGKI	DLG4	DRD1	ELAVL4	EPM2A	GPR88	GRIN1	GRIN2A	GRM5	HTT	KRAS	NF1	NLGN3	NRXN1	NRXN2	NRXN3	PPP1R9B	PRKN	RAG1	SHANK1	SHANK2	SHANK3	SRF	SYNGAP1
Cell junction assembly						N = 24	ACHE	APP	ARHGEF7	BDNF	CNTNAP1	CTNNB1	DLG1	DRD1	GABRB2	GABRB3	GPM6A	LAMA3	LAMC1	LAMC2	NLGN3	NRG1	NRXN1	NRXN2	PAK2	PTEN	SHANK1	SHANK2	SHANK3	SRF
cell junction assembly	GO:0034329	280	24	4.3	8.31e-09	6.68e-07	ACHE	APP	ARHGEF7	BDNF	CNTNAP1	CTNNB1	DLG1	DRD1	GABRB2	GABRB3	GPM6A	LAMA3	LAMC1	LAMC2	NLGN3	NRG1	NRXN1	NRXN2	PAK2	PTEN	SHANK1	SHANK2	SHANK3	SRF
synaptic growth at neuromuscular junction		5	4	40.09	1.68e-05	0.000537	APP	SHANK3	SHANK2	SHANK1
Protein localization						N = 19	BSG	CACNB2	DLG1	DLG2	DLG3	DLG4	GPHN	GRIN2A	GRIN2C	LAMA5	MAPK8IP3	NRXN1	NRXN2	PACS1	PACS2	PAK2	PPP1R9B	SHANK1	STXBP1
protein localization to cell junction	GO:1902414	87	12	6.91	5.35e-07	2.67e-05	GRIN2A	DLG1	DLG2	DLG3	DLG4	NRXN1	NRXN2	GRIN2C	MAPK8IP3	PAK2	GPHN	SHANK1
protein localization to cell periphery	GO:1990778	234	12	2.57	0.00347	0.0473	LAMA5	CACNB2	GRIN2A	DLG1	PACS2	PACS1	DLG4	STXBP1	BSG	GRIN2C	GPHN	PPP1R9B
protein localization to synapse	GO:0035418	61	11	9.04	1.46e-07	8.43e-06	GRIN2A	DLG1	DLG2	DLG3	DLG4	NRXN1	NRXN2	GRIN2C	MAPK8IP3	GPHN	SHANK1
Wnt signaling pathway						N = 17	AP2S1	CTNNB1	DISC1	EPM2A	GLI1	GSK3A	GSK3B	KDM6A	LEF1	MAGI2	PTEN	SHH	TCF3	TCF7	TCF7L1	TCF7L2	TLE3
Wnt signaling pathway	GO:0016055	349	16	2.3	0.00308	0.043	AP2S1	CTNNB1	DISC1	EPM2A	GLI1	GSK3A	GSK3B	KDM6A	LEF1	MAGI2	PTEN	SHH	TCF3	TCF7	TCF7L1	TCF7L2	TLE3
cell-cell signaling by wnt	GO:0198738	349	16	2.3	0.00308	0.043	AP2S1	CTNNB1	DISC1	EPM2A	GLI1	GSK3A	GSK3B	KDM6A	LEF1	MAGI2	PTEN	SHH	TCF3	TCF7	TCF7L1	TCF7L2	TLE3
canonical Wnt signaling pathway	GO:0060070	84	11	6.56	2.52e-06	0.000101	CTNNB1	DISC1	GLI1	GSK3B	KDM6A	LEF1	PTEN	SHH	TCF3	TCF7	TCF7L1	TCF7L2
canonical Wnt signaling pathway involved in positive regulation of epithelial to mesenchymal transition	GO:0044334	2	2	50.11	0.00223	0.0337	TCF7L2	CTNNB1
Postsynaptic processes						N = 39	ACHE	APP	CDKL5	CELF4	CHRNA6	DGKI	DLG1	DLG3	DLG4	DMPK	GABRB1	GABRB2	GPHN	GRIA1	GRIA3	GRIK1	GRIK2	GRIK3	GRIN1	GRIN2A	GRIN2B	GRIN2C	GRIN2D	GRM5	GSK3A	GSK3B	KCNA1	NLGN3	NRXN1	NRXN2	PAK3	PPP1R9A	PTEN	SHANK1	SHANK2	SHANK3	SNCA	SYNGAP1	ZMYND8
regulation of postsynaptic membrane potential	GO:0060078	100	23	11.53	2.3e-16	5.26e-14	ACHE	CHRNA6	DGKI	GABRB1	GABRB2	GRIA1	GRIA3	GRIK1	GRIK2	GRIK3	GRIN1	GRIN2A	GRIN2B	GRIN2C	GRIN2D	GRM5	GSK3A	GSK3B	KCNA1	NLGN3	PPP1R9A	SNCA
postsynapse organization	GO:0099173	88	14	7.97	1.2e-08	9.22e-07	DLG1	DLG3	DLG4	GPHN	NLGN3	NRXN1	NRXN2	PAK3	PPP1R9A	PTEN	SHANK1	SHANK2	SHANK3	SYNGAP1
modulation of excitatory postsynaptic potential	GO:0098815	45	12	13.36	8.57e-10	9.02e-08	APP	CELF4	DLG4	DMPK	GRIN1	NLGN3	NRXN1	PTEN	SHANK1	SHANK2	SHANK3	ZMYND8
regulation of postsynapse organization	GO:0099175	89	8	4.5	0.000636	0.0124	APP	CDKL5	GRIN2B	PAK3	PPP1R9A	PTEN	SHANK3	ZMYND8
neuroligin clustering involved in postsynaptic membrane assembly	GO:0097118	3	2	33.41	0.00367	0.0483	NRXN1	NRXN2
maintenance of postsynaptic specialization structure	GO:0098880	7	4	28.63	4.27e-05	0.00121	DLG1	SYNGAP1	DLG3	SHANK3
maintenance of postsynaptic density structure	GO:0099562	5	3	30.07	0.000387	0.00824	DLG1	DLG3	SHANK3
chemical synaptic transmission, postsynaptic	GO:0099565	68	15	11.05	6.62e-11	8.29e-09	NLGN3	GSK3B	ACHE	GSK3A	CHRNA6	GRIK2	PPP1R9A	GRIN2C	GRIN2B	GRIN1	GRIN2D	GRIN2A	DGKI	SNCA
postsynaptic density organization	GO:0097106	18	9	25.05	1.32e-09	1.34e-07	DLG1	SYNGAP1	DLG3	NRXN1	PTEN	NRXN2	SHANK3	SHANK2	SHANK1
postsynaptic specialization organization	GO:0099084	19	9	23.74	1.91e-09	1.85e-07	DLG1	SYNGAP1	DLG3	NRXN1	PTEN	NRXN2	SHANK3	SHANK2	SHANK1
positive regulation of excitatory postsynaptic potential	GO:2000463	29	9	15.55	3.8e-08	2.57e-06	NLGN3	APP	DLG4	NRXN1	PTEN	SHANK3	SHANK2	SHANK1	GRIN1
postsynapse assembly	GO:0099068	19	7	18.46	4.98e-07	2.5e-05	NLGN3	NRXN1	PTEN	NRXN2	SHANK3	SHANK2	SHANK1
postsynaptic density assembly	GO:0097107	8	6	37.58	1.42e-07	8.28e-06	NRXN1	PTEN	NRXN2	SHANK3	SHANK2	SHANK1
postsynaptic specialization assembly	GO:0098698	10	6	30.07	3.67e-07	1.92e-05	NRXN1	PTEN	NRXN2	SHANK3	SHANK2	SHANK1
postsynaptic membrane organization	GO:0001941	28	6	10.74	4.57e-05	0.00129	NLGN3	DLG4	NRXN1	NRXN2	SHANK3	GPHN
protein localization to postsynaptic membrane	GO:1903539	30	5	8.35	0.00056	0.0111	GRIN2A	DLG1	DLG4	GRIN2C	GPHN
protein localization to postsynapse	GO:0062237	35	5	7.16	0.00105	0.0183	GRIN2A	DLG1	DLG4	GRIN2C	GPHN
postsynaptic membrane assembly	GO:0097104	11	3	13.67	0.00231	0.0341	NLGN3	NRXN1	NRXN2
neurotransmitter receptor localization to postsynaptic specialization membrane	GO:0099645	12	3	12.53	0.00284	0.0407	DLG1	DLG4	GPHN
protein localization to postsynaptic specialization membrane	GO:0099633	12	3	12.53	0.00284	0.0407	DLG1	DLG4	GPHN
Neurotransmission						N = 33	ACHE	ADCY1	ATP1A2	BRAF	CACNB2	CASK	CLN8	DGKI	DRD1	DTNBP1	FMR1	GAD1	GAD2	GSK3B	HTT	MAOA	NRXN1	NRXN2	PPP1R9A	PRKN	SLC17A6	SLC17A7	SLC17A8	SLC32A1	SLC6A3	SNAP29	SNCA	STXBP1	STXBP2	STXBP3	SYN1	SYN2	SYN3
regulation of neurotransmitter levels	GO:0001505	224	31	6.93	4.75e-16	1.07e-13	ACHE	ADCY1	ATP1A2	BRAF	CACNB2	CASK	CLN8	DGKI	DRD1	DTNBP1	FMR1	GAD1	GAD2	GSK3B	HTT	MAOA	NRXN1	NRXN2	PPP1R9A	PRKN	SLC32A1	SLC6A3	SNAP29	SNCA	STXBP1	STXBP2	STXBP3	SYN1	SYN2	SYN3
neurotransmitter transport	GO:0006836	142	23	8.12	1.68e-13	2.94e-11	ATP1A2	CASK	CLN8	DGKI	GAD1	GAD2	HTT	NRXN1	NRXN2	PRKN	SLC17A6	SLC17A7	SLC17A8	SLC32A1	SLC6A3	SNAP29	SNCA	STXBP1	STXBP2	STXBP3	SYN1	SYN2	SYN3
regulation of neurotransmitter transport	GO:0051588	105	15	7.16	1.33e-08	9.97e-07	PRKN	GSK3B	FMR1	STXBP1	DTNBP1	CASK	ATP1A2	BRAF	ADCY1	PPP1R9A	SYN1	CACNB2	DRD1	DGKI	SNCA
regulation of neurotransmitter secretion	GO:0046928	91	13	7.16	1.24e-07	7.38e-06	PRKN	GSK3B	FMR1	STXBP1	DTNBP1	CASK	BRAF	ADCY1	PPP1R9A	SYN1	CACNB2	DGKI	SNCA
neurotransmitter uptake	GO:0001504	29	6	10.37	5.43e-05	0.0015	PRKN	HTT	ATP1A2	CLN8	SLC6A3	SNCA
negative regulation of neurotransmitter transport	GO:0051589	15	5	16.7	3.4e-05	0.000991	PRKN	FMR1	BRAF	PPP1R9A	SNCA
neurotransmitter reuptake	GO:0098810	22	5	11.39	0.000158	0.00383	PRKN	HTT	CLN8	SLC6A3	SNCA
negative regulation of neurotransmitter secretion	GO:0046929	12	4	16.7	0.000218	0.00509	PRKN	FMR1	BRAF	PPP1R9A
negative regulation of spontaneous neurotransmitter secretion	GO:1904049	2	2	50.11	0.00223	0.0334	PRKN	PPP1R9A
regulation of spontaneous neurotransmitter secretion	GO:1904048	3	2	33.41	0.00367	0.0484	PRKN	PPP1R9A
[truncated: 49 more columns]

## Sheet: Example_K.Kochinke
Gene Ontology Group	Abbreviation	Assembled from these Gene Ontology Terms
Nervous system development		Nervous system development, GO:0007399
Synapse		Synapse, GO:0045202	Synapse organization, GO:0050808	Synaptic transmission, GO:0007268
Transcription		Transcription, DNA-templated, GO:0006351
Chromatin		Chromatin remodeling, GO:0006338	Chromatin binding, GO:000368	Chromatin organization, GO:0006325
RNA metabolism		RNA metabolic process, GO:0016070
Mitochondria		Mitochondrion, GO:0005739	Oxidative phosphorylation, GO:0006119
Peroxisome		Peroxisome organization, GO:0007031
Cilia		Cilium morphogenesis, GO:006027
Glycosylation		Glycosylation, GO:0070085
Protein transport		Protein secretion, GO:0009306	Intracellular protein transport, GO:0006886
Microtubule transport	MT transport	Microtubule-based transport, GO:0010970
Vesicle transport		Vesicle mediated transport, GO:0016192	Protein secretion, GO:0009306
Ion transport		Ion channel activity, GO:0005216	Ion channel binding, GO:0044325	Metal ion transport, GO:0030001
Transporters		Transport, GO:0006810	Transporter activity, GO:0005215
Metabolism		Regulation of metabolic process, GO:0019222
Ubiquitination		Protein ubiquitination, GO:0016567
Microtubule	MT	Microtubule cytoskeleton organization, GO:0000226	Microtubule binding, GO:0008017
Actin		Actin binding, GO:0003779	Actin cytoskeleton organization, GO:0030036
Centrosome		Centrosome localization, GO:0051642	Centrosome organization, GO:0051297
Cell cycle		Cell cycle, GO:0007049
Response to growth factor	Response to GF	Response to growth factor, GO:0070848
MAPK signaling	MAPK	MAPK cascade, GO:0000165	Ras protein signal transduction, GO:0007265
Small GTPase signaling	GTPase	Small GTPase binding, GO:0031267	Small GTPase mediated signal transduction, GO:0007264	Small GTPase regulator activity, GO:0005083
Hedgehog signaling		Smoothened signaling pathway, GO:0007224
TOR signaling	TOR	TOR signaling, GO:0031929
Glutamate receptor signaling	Glutamate receptor	Glutamate receptor activity, GO:0008066	Glutamate receptor binding, GO:0035254	Glutamate receptor signaling pathway, GO:0007215
Dopamine receptor signaling pathway	Dopamine receptor	Dopamine receptor signaling pathway, GO:0007212
BMP signaling		BMP signaling pathway, GO:0030509
Wnt signaling	Wnt	Wnt signaling pathway, GO:0016055
Cardiac muscle contraction	Cardiac muscle	Cardiac muscle contraction, GO:0060048
